# Supplementary material for: Tuneable emission in single molecule dyads mediated by a charge transfer state
Source: Royal Society of Chemistry journal article supplement (doi:10.1039/d3cp02130k), 2023-01-01
Supplement: d3cp02130k1.pdf [file d3cp02130k1.pdf]

## Supporting Information

### Tuneable Emission in Single Molecule Dyads Mediated by a Charge Transfer State

Matthew W. Brett<sup>a,b,c</sup>, Michael B. Price<sup>a,b,c</sup>, Calum K. Gordon<sup>a,b,c</sup>, Karen E. Thorn<sup>a,b</sup>, Lara D. Browne<sup>a,b,c</sup>, Paul A. Hume<sup>a,b</sup>, Justin M. Hodgkiss<sup>a,b</sup>, Bridget L. Stocker<sup>a</sup>, Mattie S. M. Timmer<sup>a</sup>, Nathaniel J. L. K. Davis<sup>\*a,b,c</sup>

<sup>a</sup>School of Chemical and Physical Sciences, Victoria University of Wellington, Wellington 6140, New Zealand.

<sup>b</sup>The MacDiarmid Institute for Advanced Materials and Nanotechnology, Victoria University of Wellington, Wellington 6140, New Zealand

<sup>c</sup>The Dodd-Walls Centre for Photonic and Quantum Technologies, University of Otago, Dunedin 9056, New Zealand

\* Email: [nathaniel.davis@vuw.ac.nz](mailto:nathaniel.davis@vuw.ac.nz)

### SI Table of Contents

|     |                                                                       |    |
|-----|-----------------------------------------------------------------------|----|
| 1   | Organic Synthesis .....                                               | 3  |
| 1.1 | General Synthetic Information .....                                   | 3  |
| 1.2 | Perylene Precursor Synthesis .....                                    | 4  |
| 1.3 | Tetracene Precursor Synthesis .....                                   | 9  |
| 1.4 | Pentacene Precursor Synthesis.....                                    | 13 |
| 1.5 | Synthesis of Dyads 4 – 7 .....                                        | 16 |
| 1.6 | <sup>1</sup> H and <sup>13</sup> C NMR spectra of dyads 4 – 7.....    | 22 |
| 2   | Additional Figures and Analysis .....                                 | 32 |
| 2.1 | Structures of numbered molecules not presented in the mian text. .... | 32 |
| 2.2 | Solvent Dependent PLQE of PerTet-1 .....                              | 32 |
| 2.3 | Lippert-Mataga .....                                                  | 33 |
| 2.4 | Computational Energy Levels .....                                     | 33 |
| 2.5 | Rehm-Weller Calculation .....                                         | 34 |

|    |     |                                            |    |
|----|-----|--------------------------------------------|----|
| 28 | 2.6 | Estimated Energy Transfer Efficiency ..... | 34 |
| 29 | 2.7 | Time-Resolved Emission Spectroscopy.....   | 34 |
| 30 | 2.8 | Tetracene degradation .....                | 35 |
| 31 | 3   | References .....                           | 36 |
| 32 |     |                                            |    |
| 33 |     |                                            |    |

# 34 1 Organic Synthesis

## 35 1.1 General Synthetic Information

36 Unless otherwise stated, all reactions were performed under an atmosphere of argon and in oven-  
37 dried glassware. THF (Carlo Erba) was distilled from sodium/benzophenone under an atmosphere of  
38 argon prior to use. Solvents H<sub>2</sub>O, EtOAc (Fisher Scientific), MeOH (Fisher Scientific) and petroleum  
39 ether (Merck) were distilled prior to use. Other solvents CH<sub>2</sub>Cl<sub>2</sub> (Fisher Scientific), EtOH (Fisher  
40 Scientific), aqueous ammonia (Fisher Scientific), toluene (Carlo Erba), chloroform (Carlo Erba), 1,4-  
41 dioxane (Ajax Chemicals), carbon tetrachloride (AnalaR) and anhydrous DMF (Acros Organics) were  
42 used as received. Reagents perylene (AK Scientific), *N*-bromosuccinimide (Sigma Aldrich), MgSO<sub>4</sub>  
43 (Fisher Scientific), bis(pinacolato)diboron (AK Scientific), potassium acetate (BDH), [1,1'-  
44 Bis(diphenylphosphino)ferrocene]dichloro palladium(II) (AK Scientific), sodium bicarbonate (Fisher  
45 Scientific), 1,4-dibromobenzene (BDH), *n*-BuLi (Sigma Aldrich), sodium azide (BDH), NaCl (Fisher  
46 Scientific), triphenylphosphine (Acros Scientific), 4-bromo-1,2-dimethylbenzene (Carbosynth),  
47 benzoyl peroxide (Ajax Chemicals), sodium thiosulfate (BDH), 1,4-naphthoquinone (BDH), potassium  
48 iodide (Pure Science), triisopropylsilyl acetylene (AK Scientific), hydrochloric acid (Fisher Scientific), tin  
49 (II) chloride dihydrate (Sigma Aldrich), 4-carboxyphenylboronic acid (Carbosynth), potassium  
50 carbonate (Fisher Scientific), quinizarin (BDH), sodium borohydride (Sigma Aldrich), ammonium  
51 chloride (BDH), *N,N,N',N'*-Tetramethyl-*O*-(1*H*-benzotriazol-1-yl)uronium hexafluorophosphate (Sigma  
52 Aldrich), *N,N*-diisopropylethylamine (Sigma Aldrich) were used as received. Concentrations of solutions  
53 *in vacuo* was achieved using a rotary evaporator fitted to a vacuum pump, with a bath temperature  
54 between 50 – 60 °C. Reaction progress was monitored using TLC-analysis on Macherey-Nagel silica gel  
55 coated plastic sheets (0.20 mm, with fluorescent indicator UV<sub>254</sub>) with detection by UV-absorption  
56 (short wave UV: 254 nm; long wave UV: 266 nm). Purification by column chromatography was  
57 conducted using glass columns packed with silica gel (Apollo Scientific Silica Gel 60, 40 – 63 microns)  
58 as the stationary phase and solvent system as indicated. Infrared spectra were recorded as thin films  
59 using a Bruker Tensor 27 FTIR spectrometer equipped with an Attenuated Total Reflectance (ATR)  
60 sampling accessory. NMR spectra were recorded at 20 °C in CDCl<sub>3</sub> (Sigma-Aldrich), CDCl<sub>3</sub>/TMS (Sigma-  
61 Aldrich) or pyridine-*d*<sub>5</sub> (Apollo Scientific) using either a Jeol JNM-ECZ500S or JNM-ECZ600R, operating  
62 at 500 MHz or 600 MHz, respectively. Chemical shifts are given in ppm (δ) relative to TMS or the  
63 solvent residual peak(s). NMR peak assignments were made using COSY, HSQC and HMBC 2D  
64 experiments. HRMS analysis was performed on an Agilent 6530 Quadrupole Time-of-Flight (Q-TOF)  
65 mass spectrometer equipped with a JetStream™ electrospray ionisation (ESI) source in negative or  
66 positive mode. Absorbance was recorded on a Varian Cary 4000 UV-vis spectrophotometer.

67 Fluorescence was recorded on either an Edinburgh Photonics FLS-980 spectrophotometer exciting  
 68 with a 450 W ozone-free xenon arc lamp, or an Ocean-Optics QE Pro Spectrometer exciting with a  
 69 380nm light-emitting diode.

## 70 1.2 Perylene Precursor Synthesis

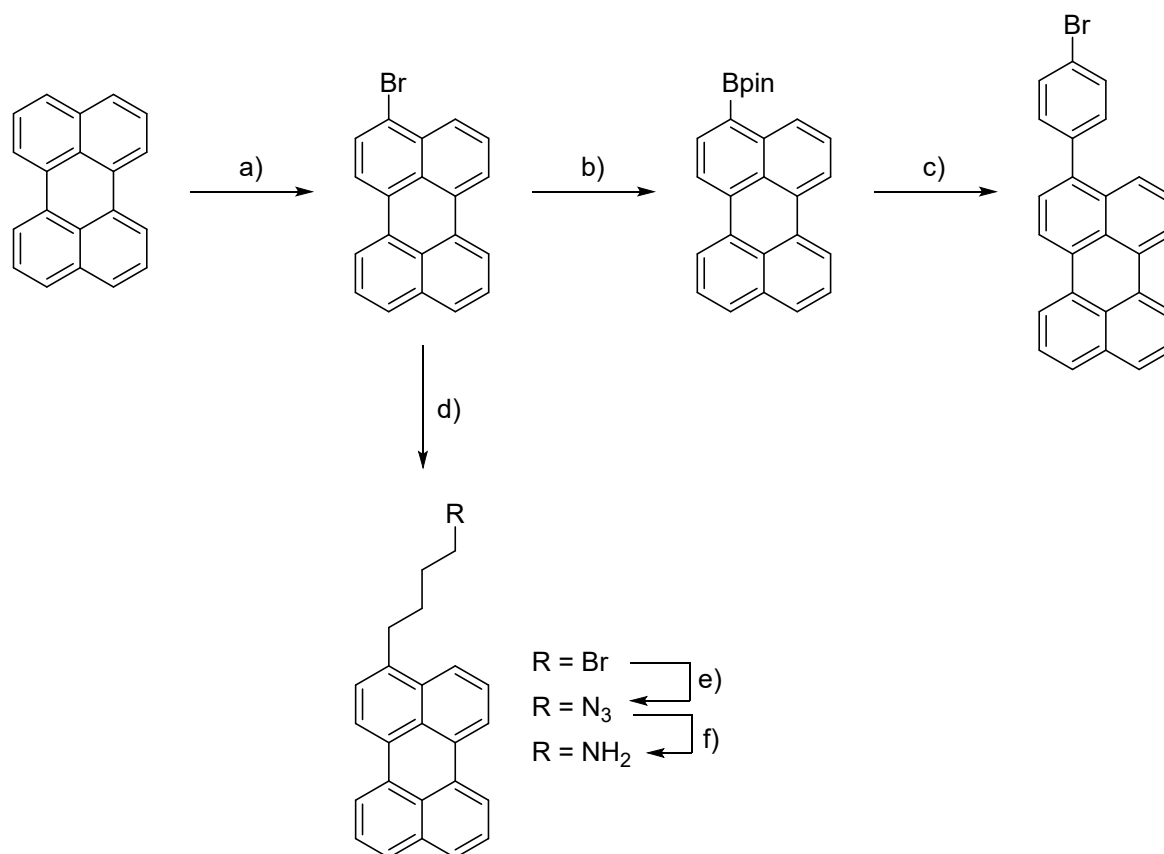

72 Scheme S1. Synthesis of the perylene precursors used. Conditions: a) NBS, THF, 16 h. r.t., 90%;<sup>1</sup> b)  
 73 Bpin<sub>2</sub>, KOAc, Pd(dppf)Cl<sub>2</sub>, 1,4-dioxane, 16 h., 70°C, 63%;<sup>2</sup> c) *p*-C<sub>6</sub>H<sub>4</sub>Br<sub>2</sub>, KOAc, Pd(dppf)Cl<sub>2</sub>, THF/H<sub>2</sub>O, 16  
 74 h., 70°C, 59%; d) *n*-BuLi, THF, 30 min., -78°C, then 1,4-dibromobutane, 30 min., 0°C, 34%; e) NaN<sub>3</sub>,  
 75 DMF, 1.5 h., r.t., quant.; f) PPh<sub>3</sub>, H<sub>2</sub>O, THF, 1 h., Δ, 79%.

76 **3-Bromoperylene.**<sup>1</sup> Perylene (1.1 g, 4.4 mmol) was dissolved in THF (11.3 mL/mmol,  
 77 49.5 mL). A solution of *N*-bromosuccinimide (0.931 g, 5.23 mmol) in THF (49.5 mL)  
 78 was added to this, and the solution stirred for 16 hours at room temperature under  
 79 an argon atmosphere. The mixture was poured into water (200 mL) and extracted  
 80 with CH<sub>2</sub>Cl<sub>2</sub> (200 mL). The organic layer was dried with MgSO<sub>4</sub>, filtered and  
 81 concentrated *in vacuo* to afford the product as a yellow crystalline solid (1.29 g,  
 82 90%). *R*<sub>f</sub> (75:25, Petroleum Ether:CH<sub>2</sub>Cl<sub>2</sub>) = 0.76; IR (film)  $\tilde{\nu}$  = 3047, 1571, 1377, 762 cm<sup>-1</sup>; <sup>1</sup>H NMR (600  
 83 MHz, CDCl<sub>3</sub>/TMS)  $\delta$  8.25 (d, *J*<sub>5,6</sub> = 7.7 Hz, 1H, H-6), 8.21 (d, *J*<sub>7,8</sub> = 7.5 Hz, 1H, H-7), 8.17 (d, *J*<sub>11,12</sub> = 7.5 Hz,  
 84 1H, H-12), 8.09 (d, *J*<sub>4,5</sub> = 8.3 Hz, 1H, H-4), 8.01 (d, *J*<sub>1,2</sub> = 8.1 Hz, 1H, H-1), 7.77 (d, *J*<sub>1,2</sub> = 8.1 Hz, 1H, H-2),

85 7.71 (m, 2H, H-9, H-10), 7.59 (dd,  $J_{4,5} = 8.3$  Hz,  $J_{5,6} = 7.7$  Hz, 1H, H-5), 7.49 (m, 2H, H-8, H-11);  $^{13}\text{C}$  NMR  
 86 (150 MHz,  $\text{CDCl}_3/\text{TMS}$ )  $\delta$  134.8 (C-9a), 133.3 (C-3a), 131.8 (C-6a), 131.4 (C-12b), 130.93 (C-6b/C-12a),  
 87 130.89 (C-6b/C-12a), 130.85 (C-2), 130.7 (C-6b<sup>1</sup>), 130.1 (C-3a<sup>1</sup>), 128.5 (C-9/C-10), 128.4 (C-9/C-10),  
 88 127.9 (C-5), 127.1 (C-4), 126.9 (C-8/C-11), 126.8 (C-8/C-11), 122.7 (C-3), 121.2 (C-6), 121.0 (C-7), 120.7  
 89 (C-12), 120.6 (C-1); UV-Vis ( $\text{CH}_2\text{Cl}_2$ )  $\lambda$ , nm ( $\epsilon$ ,  $\text{M}^{-1}\text{cm}^{-1}$ ) = 400 (6317), 422 (13643), 448 (17406);  
 90 Fluorescence ( $\text{CH}_2\text{Cl}_2$ ,  $\lambda_{\text{ex}} = 380$  nm)  $\lambda_{\text{max}} = 485$  nm; HRMS (ESI)  $m/z$  calcd. for  $[\text{C}_{20}\text{H}_{11}\text{Br}]^{+\cdot}$ : 330.0039,  
 91 obsd.: 330.0038; mp. 241.3 – 242.7°C.

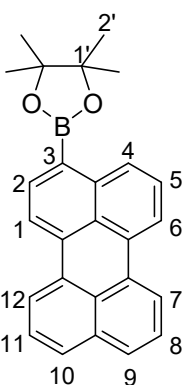

92 **4,4,5,5-tetramethyl-2-(perylene-3-yl)-1,3,2-dioxaborolane.**<sup>2</sup> 3-Bromoperylene

93 (0.100 g, 0.30 mmol), bis(pinacolato)diboron (0.215 g, 0.85 mmol) and potassium  
 94 acetate (0.089 g, 0.91 mmol) were dissolved in 1,4-dioxane (35 mL/mmol, 10.5 mL)  
 95 under an argon atmosphere. [1,1'-Bis(diphenylphosphino)ferrocene]dichloro  
 96 palladium(II) (7 mol %, 15.4 mg) was added to this, and the solution heated to 70°C  
 97 for 16 hours. The reaction mixture was cooled to room temperature and  
 98 concentrated *in vacuo* to remove dioxane. The resulting solid was redissolved in  
 99  $\text{CH}_2\text{Cl}_2$  (100 mL), and the organic layer washed with saturated aqueous sodium  
 100 bicarbonate (2 x 100 mL) and brine (100 mL). The organic layer was dried with  $\text{MgSO}_4$ , filtered, and  
 101 concentrated under reduced pressure. The crude product was purified using silica gel column  
 102 chromatography (80/20, Petroleum Ether/ $\text{CH}_2\text{Cl}_2$ , v/v) to afford the product as a yellow crystalline  
 103 solid (71 mg, 63%).  $R_f$  (66/34, Petroleum Ether/ $\text{CH}_2\text{Cl}_2$ , v/v) = 0.29; IR (film)  $\tilde{\nu} = 2970, 2930, 1585, 1316,$   
 104  $1060$   $\text{cm}^{-1}$ ;  $^1\text{H}$  NMR (500 MHz,  $\text{CDCl}_3$ )  $\delta$  8.66 (d,  $J_{4,5} = 8.3$  Hz, 1H, H-4), 8.24 (d,  $J_{11,12} = 7.8$  Hz, 1H, H-12),  
 105 8.21 (m, 2H, H-6, H-7), 8.18 (d,  $J_{1,2} = 7.5$  Hz, 1H, H-1), 8.06 (d,  $J_{1,2} = 7.5$  Hz, 1H, H-2), 7.70 (d,  $J_{10,11} = 7.8$   
 106 Hz, 1H, H-10), 7.67 (d,  $J_{8,9} = 7.8$  Hz, 1H, H-9), 7.54 (dd,  $J_{4,5} = 8.3$  Hz,  $J_{5,6} = 7.6$  Hz, 1H, H-5), 7.49 (t,  $J_{8,9}/J_{10,11}$   
 107 = 7.8 Hz, 1H, H-8/H-11), 7.48 (t,  $J_{8,9}/J_{10,11} = 7.8$  Hz, 1H, H-8/H-11), 1.44 (s, 12H, H-2');  $^{13}\text{C}$  NMR (125 MHz,  
 108  $\text{CDCl}_3$ )  $\delta$  138.6 (C-3a), 136.4 (C-2), 134.7 (C-9a), 134.2 (C-12b), 131.7 (C-6b), 131.3 (C-12a), 131.2 (C-  
 109 6a), 128.8 (C-6b<sup>1</sup>), 128.7 (C-3a<sup>1</sup>, C-4), 128.5 (C-10), 127.8 (C-9), 127.0 (C-5), 126.9 (C-3, observed only  
 110 by HMBC), 126.8 (C-8/C-11), 126.7 (C-8/C-11), 121.1 (C-12), 120.5 (C-7), 120.3 (C-6), 119.5 (C-1), 83.9  
 111 (C-1'), 25.1 (C-2'); UV-Vis ( $\text{CH}_2\text{Cl}_2$ )  $\lambda$ , nm ( $\epsilon$ ,  $\text{M}^{-1}\text{cm}^{-1}$ ) = 400 (10080), 422 (21773), 450 (27283);  
 112 Fluorescence ( $\text{CH}_2\text{Cl}_2$ ,  $\lambda_{\text{ex}} = 380$  nm)  $\lambda_{\text{max}} = 461$  nm; HRMS (ESI)  $m/z$  calcd. for  $[\text{C}_{26}\text{H}_{24}\text{BO}_2]^{+\cdot}$ : 379.1864,  
 113 obsd.: 379.1863; mp. 236.7 – 237.8°C.

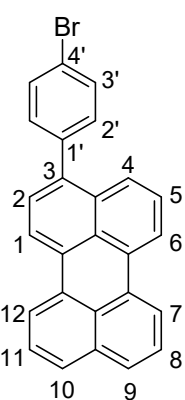

114 **3-(4-bromophenyl)perylene.** 4,4,5,5-tetramethyl-2-(perylene-3-yl)-1,3,2-

115 dioxaborolane (52.2mg, 0.14 mmol), 1,4-dibromobenzene (97.7 mg, 0.41 mmol)  
 116 and potassium acetate (94.0 mg, 0.96 mmol) were dissolved in a THF (14.4 mL) and  
 117  $\text{H}_2\text{O}$  (0.48 mL) solution under an argon atmosphere. [1,1'-  
 118 Bis(diphenylphosphino)ferrocene]dichloro palladium(II) (10 mol %, 10.2 mg) was

119 added to this solution, and the reaction heated to 70°C for 16 hours. The reaction mixture was cooled  
 120 to room temperature, concentrated *in vacuo* before being flushed through a silica gel plug with 9:1  
 121 Petroleum Ether:CH<sub>2</sub>Cl<sub>2</sub> to elute the product as a yellow crystalline solid (32.9 mg, 59%). R<sub>f</sub> (75:25,  
 122 Petroleum Ether:CH<sub>2</sub>Cl<sub>2</sub>) = 0.78; IR (film)  $\tilde{\nu}$  = 3047, 1589, 1387, 765 cm<sup>-1</sup>; <sup>1</sup>H NMR (500 MHz, CDCl<sub>3</sub>/TMS)  
 123  $\delta$  8.23 (m, 4H, H-4, H-6, H-7, H-12), 7.71 (d,  $J_{8,9} = J_{10,11} = 8.0$  Hz, 2H, H-9, H-10), 7.70 (d,  $J_{1,2} = 8.3$  Hz, 1H,  
 124 H-1), 7.64 (d,  $J_{2,3'} = 8.3$  Hz, 2H, H-2'), 7.50 (t,  $J_{8,9} = J_{10,11} = 8.0$  Hz, 2H, H-8, H-11), 7.44 (dd,  $J_{4,5}/J_{5,6} = 8.3$   
 125 Hz,  $J_{4,5}/J_{5,6} = 7.7$  Hz, 1H, H-5), 7.40 (d,  $J_{1,2} = 8.3$  Hz,  $J_{2,3'} = 8.3$  Hz, 3H, H-2, H-3'); <sup>13</sup>C NMR (125 MHz,  
 126 CDCl<sub>3</sub>/TMS)  $\delta$  139.8 (C-1'), 138.7 (C-3), 134.8 (C-9a), 132.9 (C-3a), 131.8 (C-2'), 131.73 (C-3'), 131.68  
 127 (C-6a), 131.4 (C-12b), 131.23 (C-6b/C-12a), 131.20 (C-6b/C-12a), 129.2 (C-3a<sup>1</sup>), 128.8 (C-6b<sup>1</sup>), 128.11  
 128 (C-9/C-10), 128.09 (C-9/C-10), 127.8 (C-2), 126.9 (C-5), 126.8 (C-8, C-11), 125.8 (C-1), 121.7 (C-4'),  
 129 120.62 (C-7/C-12), 120.59 (C-7/C-12), 120.4 (C-4/C-6), 120.0 (C-4/C-6); UV-Vis (CH<sub>2</sub>Cl<sub>2</sub>)  $\lambda$ , nm ( $\epsilon$ , M<sup>-1</sup>cm<sup>-1</sup>)  
 130 <sup>1</sup>) = 399 (53032), 422 (117427), 448 (143943); Fluorescence (CH<sub>2</sub>Cl<sub>2</sub>,  $\lambda_{\text{ex}} = 380$  nm)  $\lambda_{\text{max}} = 464$  nm; HRMS  
 131 (ESI) *m/z* calcd. for [C<sub>26</sub>H<sub>16</sub>Br]<sup>+</sup>: 407.0430, obsd.: 407.0427; mp. 238.1 – 239.3°C.

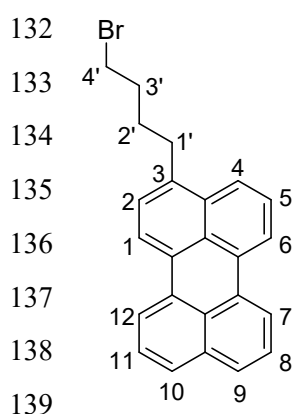

**3-(4-bromobutyl)perylene.** 3-bromoperylene (0.171 g, 0.51 mmol) was co-  
 evaporated *in vacuo* with toluene three times and placed under an argon  
 atmosphere. Dry, freshly distilled THF (3 mL/mmol, 1.53 mL) was added, and *n*-  
 butyllithium (2M in cyclohexane, 0.39 mL, 0.78 mmol) was added dropwise to this  
 suspension at -78°C. This was stirred for 30 minutes, before warming to 0°C and  
 adding 1,4-dibromobutane (0.10 mL, 0.88 mmol). The resulting solution was  
 stirred for 30 minutes before warming to room temperature and partitioning the  
 reaction between water (50 mL) and CH<sub>2</sub>Cl<sub>2</sub> (50 mL). The organic layer was dried

140 with MgSO<sub>4</sub>, filtered and concentrated. The crude residue was purified using silica gel column  
 141 chromatography (90/10, Petroleum Ether/CH<sub>2</sub>Cl<sub>2</sub>, v/v) to afford the product as a yellow solid (68 mg,  
 142 34%). R<sub>f</sub> (84/16, Petroleum Ether/CH<sub>2</sub>Cl<sub>2</sub>) = 0.27; IR (film)  $\tilde{\nu}$  = 2938, 2867, 1502, 765 cm<sup>-1</sup>; <sup>1</sup>H NMR (500  
 143 MHz, CDCl<sub>3</sub>/TMS)  $\delta$  8.22 (d,  $J_{5,6} = 7.6$  Hz, 1H, H-6), 8.19 (d,  $J_{7,8} = 7.6$  Hz, 1H, H-7), 8.16 (d,  $J_{11,12} = 7.6$  Hz,  
 144 1H, H-12), 8.13 (d,  $J_{1,2} = 7.7$  Hz, 1H, H-1), 7.87 (d,  $J_{4,5} = 8.4$  Hz, 1H, H-4), 7.68 (d,  $J_{8,9}/J_{10,11} = 7.6$  Hz, 1H,  
 145 H-9/H-10), 7.66 (d,  $J_{8,9}/J_{10,11} = 7.6$  Hz, 1H, H-9/H-10), 7.53 (dd,  $J_{4,5} = 8.4$ ,  $J_{5,6} = 7.6$  Hz, 1H, H-5), 7.48 (t,  
 146  $J_{7,8} = J_{8,9} = J_{10,11} = J_{11,12} = 7.6$  Hz, 1H, H-8/H-11), 7.47 (t,  $J_{7,8} = J_{8,9} = J_{10,11} = J_{11,12} = 7.6$  Hz, 1H, H-8/H-11),  
 147 7.34 (d,  $J_{1,2} = 7.7$  Hz, 1H, H-2), 3.48 (t,  $J_{3',4'} = 6.6$  Hz, 2H, H-4'), 3.06 (t,  $J_{1',2'} = 7.6$  Hz, 2H, H-1'), 2.02 (m,  
 148 2H, H-3'), 1.93 (m, 2H, H-2'); <sup>13</sup>C NMR (125 MHz, CDCl<sub>3</sub>/TMS)  $\delta$  138.0 (C-3), 134.8 (C-9a), 133.1 (C-3a),  
 149 132.0 (C-6a), 131.6 (C-6b, C-12a), 129.9 (C-12b), 129.3 (C-3a<sup>1</sup>), 128.7 (C-6b<sup>1</sup>), 127.9 (C-9/C-10), 127.6  
 150 (C-9/C-10), 127.1 (C-2), 126.8 (C-8/C-11), 126.7 (C-8/C-11), 126.6 (C-5), 123.8 (C-4), 120.4 (C-6), 120.3  
 151 (C-7), 120.2 (C-1), 119.9 (C-12), 33.7 (C-4'), 32.8 (C-3'), 32.6 (C-1'), 29.1 (C-2'); UV-Vis (CH<sub>2</sub>Cl<sub>2</sub>)  $\lambda$ , nm ( $\epsilon$ ,

152  $M^{-1}cm^{-1}$ ) = 396 (58156), 418 (122128), 444 (157469); Fluorescence ( $CH_2Cl_2$ ,  $\lambda_{ex}$  = 380 nm)  $\lambda_{max}$  = 453  
153 nm; HRMS (ESI)  $m/z$  calcd. for  $[C_{24}H_{20}Br]^+$ : 387.0743, obsd.: 387.0740.

154 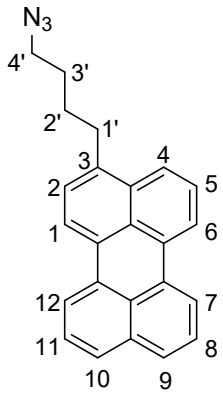 **3-(4-azidobutyl)perylene.** 3-(4-bromobutyl)perylene (77.4 mg, 0.20 mmol) and  
155 sodium azide (17.0 mg, 0.26 mmol) were stirred in DMF (12.5 mL/mmol, 2.5 mL)  
156 for 1.5 hours at room temperature. The reaction mixture was poured into water  
157 (10 mL), and this was extracted with  $CH_2Cl_2$  (3 x 10 mL). The combined organic  
158 layers were washed with brine (10 mL), and the organic layer dried with  $MgSO_4$ .  
159 The organic layer was filtered and concentrated *in vacuo* to afford the azide as a  
160 yellow crystalline solid (69.8 mg, quant.).  $R_f$  (75/25, Petroleum Ether/ $CH_2Cl_2$ , v/v)  
161 = 0.41; IR (film)  $\tilde{\nu}$  = 3046, 2934, 2863, 2088, 1589, 1265  $cm^{-1}$ ;  $^1H$  NMR (500 MHz,  
162  $CDCl_3$ )  $\delta$  8.22 (d,  $J_{5,6}$  = 7.6 Hz, 1H, H-6), 8.19 (d,  $J_{7,8}$  = 7.6 Hz, 1H, H-7), 8.16 (d,  $J_{11,12}$  = 7.6 Hz, 1H, H-12),  
163 8.12 (d,  $J_{1,2}$  = 7.7 Hz, 1H, H-1), 7.85 (d,  $J_{4,5}$  = 8.4 Hz, 1H, H-4), 7.68 (d,  $J_{8,9}/J_{10,11}$  = 7.6 Hz, 1H, H-9/H-10),  
164 7.66 (d,  $J_{8,9}/J_{10,11}$  = 7.6 Hz, 1H, H-9/H-10), 7.52 (dd,  $J_{4,5}$  = 8.4 Hz,  $J_{5,6}$  = 7.6 Hz, 1H, H-5), 7.48 (t,  $J_{7,8}$  =  $J_{8,9}$   
165 =  $J_{10,11}$  =  $J_{11,12}$  = 7.6 Hz, 1H, H-8/H-11), 7.47 (t,  $J_{7,8}$  =  $J_{8,9}$  =  $J_{10,11}$  =  $J_{11,12}$  = 7.6 Hz, 1H, H-8/H-11), 7.33 (d,  $J_{1,2}$   
166 = 7.7 Hz, 1H, H-2), 3.34 (t,  $J_{3',4'}$  = 6.8 Hz, 2H, H-4'), 3.06 (t,  $J_{1',2'}$  = 7.6 Hz, 2H, H-1'), 1.87 (m, 2H, H-2'),  
167 1.76 (m, 2H, H-3');  $^{13}C$  NMR (125 MHz,  $CDCl_3$ )  $\delta$  138.0 (C-3), 134.8 (C-9a), 133.1 (C-3a), 132.0 (C-6a),  
168 131.5 (C-6b, C-12a), 129.9 (C-12b), 129.3 (C-3a<sup>1</sup>), 128.7 (C-6b<sup>1</sup>), 127.9 (C-9/C-10), 127.6 (C-9/C-10),  
169 127.0 (C-2), 126.74 (C-8/C-11), 126.70 (C-8/C-11), 126.6 (C-5), 123.7 (C-4), 120.4 (C-6/C-7), 120.3 (C-  
170 6/C-7), 120.2 (C-1), 119.9 (C-12), 51.5 (C-4'), 32.9 (C-1'), 29.0 (C-3'), 27.6 (C-2'); UV-Vis ( $CH_2Cl_2$ )  $\lambda$ , nm  
171 ( $\epsilon$ ,  $M^{-1}cm^{-1}$ ) = 396 (42461), 418 (92743), 444 (114470); Fluorescence ( $CH_2Cl_2$ ,  $\lambda_{ex}$  = 380 nm)  $\lambda_{max}$  = 452  
172 nm; HRMS (ESI)  $m/z$  calcd. for  $[C_{24}H_{20}N_3]^+$ : 350.1652, obsd.: 350.1652; mp. 135.3 – 136.1°C.

173 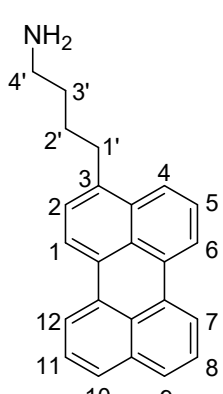 **3-(4-aminobutyl)perylene.** 3-(4-azidobutyl)perylene (20.6 mg, 59  $\mu$ mol) and  
174 triphenylphosphine (31 mg, 0.12 mmol) were dissolved in THF under an argon  
175 atmosphere. Water (5  $\mu$ L, 0.28 mmol) was added, and the reaction heated to  
176 reflux for 1 hour. The reaction was cooled to room temperature and concentrated  
177 *in vacuo*. The crude residue was purified using silica gel column chromatography  
178 ( $CH_2Cl_2$ /EtOH/MeOH/25% aq.  $NH_3$ , 95/2/2/1, v/v/v/v), eluting the product as a  
179 yellow solid (15 mg, 79%).  $R_f$  ( $CH_2Cl_2$ /EtOH/MeOH/25% aq.  $NH_3$ , 90/4/4/2,  
180 v/v/v/v) = 0.63; IR (film)  $\tilde{\nu}$  = 3476, 2930, 1497, 1386, 1255  $cm^{-1}$ ;  $^1H$  NMR (600 MHz,  
181  $CDCl_3$ /TMS)  $\delta$  8.21 (d,  $J_{5,6}$  = 7.7 Hz, 1H, H-6), 8.18 (d,  $J_{7,8}$  = 7.6 Hz, 1H, H-7), 8.15 (d,  $J_{11,12}$  = 7.6 Hz, 1H,  
182 H-12), 8.11 (d,  $J_{1,2}$  = 7.7 Hz, 1H, H-1), 7.87 (d,  $J_{4,5}$  = 8.4 Hz, 1H, H-4), 7.66 (m, 2H, H-9, H-10), 7.51 (dd,  
183  $J_{4,5}$  = 8.4 Hz,  $J_{5,6}$  = 7.7 Hz, 1H, H-5), 7.47 (t,  $J_{7,8}$  =  $J_{8,9}$  =  $J_{10,11}$  =  $J_{11,12}$  = 7.6 Hz, 1H, H-8/H-11), 7.46 (t,  $J_{7,8}$  =  
184  $J_{8,9}$  =  $J_{10,11}$  =  $J_{11,12}$  = 7.6 Hz, 1H, H-8/H-11), 7.33 (d,  $J_{1,2}$  = 7.7 Hz, 1H, H-2), 3.04 (t,  $J_{1',2'}$  = 7.7 Hz, 2H, H-1'),  
185 2.76 (t,  $J_{3',4'}$  = 7.1 Hz, 2H, H-4'), 1.79 (m, 2H, H-2'), 1.60 (m, 2H, H-3');  $^{13}C$  NMR (150 MHz,  $CDCl_3$ /TMS)

186  $\delta$  138.7 (C-3), 134.8 (C-9a), 133.2 (C-3a), 132.0 (C-6a), 131.6 (C-6b, C-12a), 129.7 (C-12b), 129.3 (C-3a<sup>1</sup>),  
 187 128.7 (C-6b<sup>1</sup>), 127.9 (C-9/C-10), 127.5 (C-9/C-10), 127.0 (C-2), 126.74 (C-8/C-11), 126.68 (C-8/C-11),  
 188 126.5 (C-5), 123.9 (C-4), 120.29 (C-6/C-7), 120.25 (C-6/C-7), 120.2 (C-1), 119.9 (C-12), 42.3 (C-4'), 34.1  
 189 (C-3'), 33.4 (C-1'), 28.0 (C-2'); UV-Vis (CH<sub>2</sub>Cl<sub>2</sub>)  $\lambda$ , nm ( $\epsilon$ , M<sup>-1</sup>cm<sup>-1</sup>) = 398 (26091), 419 (87620), 446  
 190 (120721); Fluorescence (CH<sub>2</sub>Cl<sub>2</sub>,  $\lambda_{\text{ex}}$  = 380 nm)  $\lambda_{\text{max}}$  = 452 nm; HRMS (ESI)  $m/z$  calcd. for [C<sub>24</sub>H<sub>22</sub>N]<sup>+</sup>:  
 191 324.1747, obsd.: 324.1748.

### 192 1.3 Tetracene Precursor Synthesis

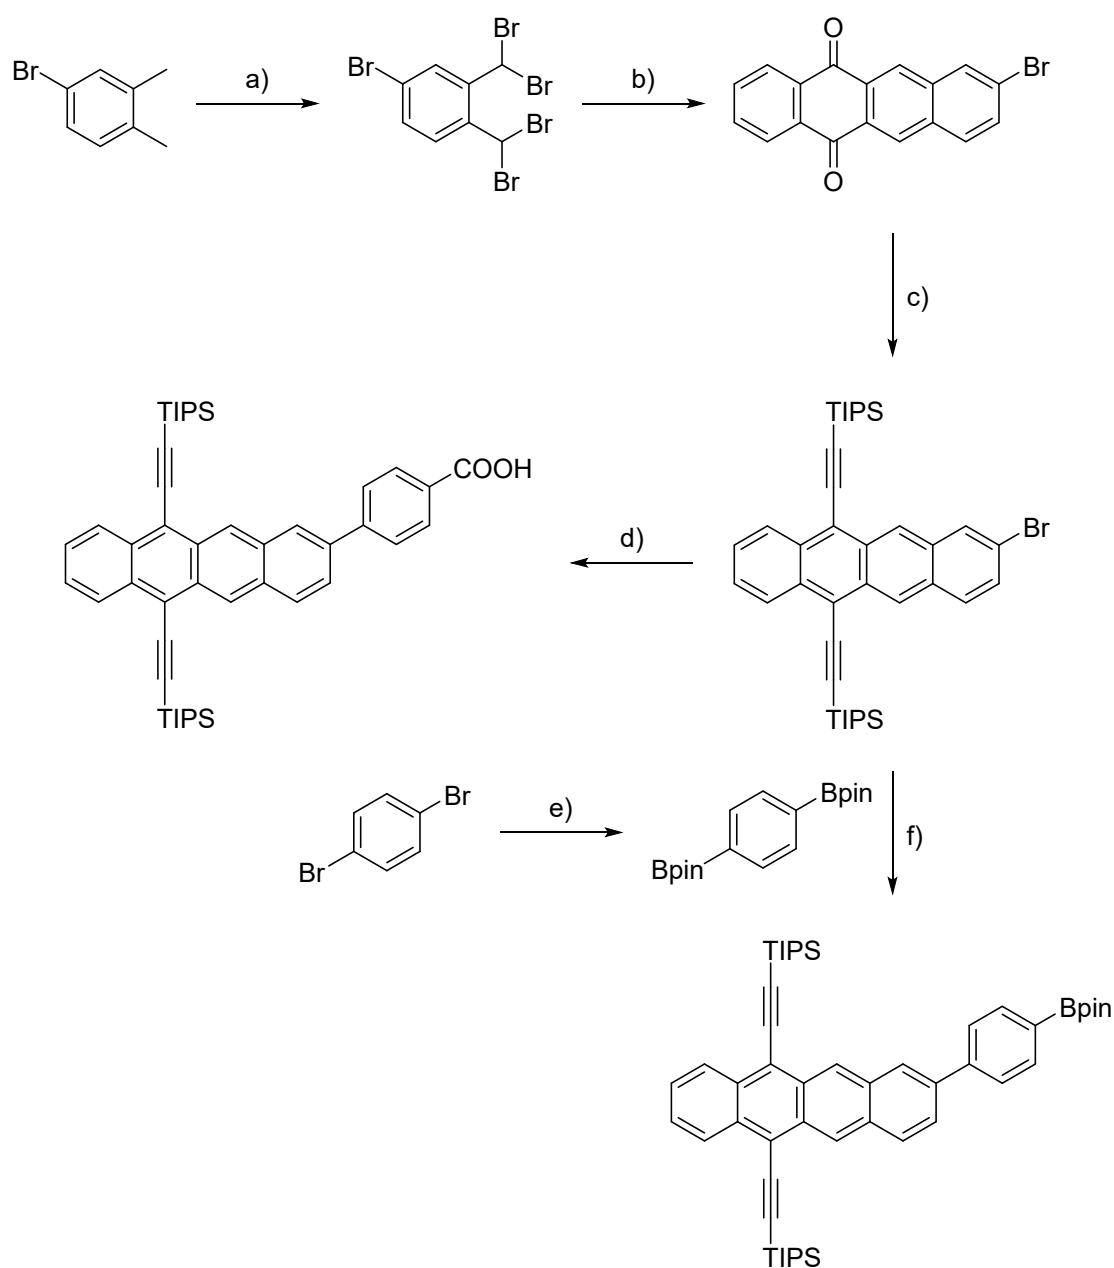

193

194 Scheme S2. Synthesis of the tetracene precursors used. Conditions: a) NBS, BPO, CCl<sub>4</sub>, 2 h.,  $\Delta$ , then  
 195 NBS, BPO, 18 h.,  $\Delta$ , 87%;<sup>3,4</sup> b) 1,4-naphthoquinone, DMF, KI, 64 h., 80°C, 76%;<sup>5</sup> c) TIPS-  
 196 acetylene, *n*-BuLi, 1 h., -78°C to 0°C, then 8-bromotetracene-5,12-dione, 16 h., r.t.,



197 then HCl, SnCl<sub>2</sub>·2H<sub>2</sub>O, H<sub>2</sub>O, 2 h., r.t., 81%;<sup>6, 7</sup> d) 4-carboxyphenylboronic acid, K<sub>2</sub>CO<sub>3</sub>,  
198 Pd(dppf)Cl<sub>2</sub>, THF/H<sub>2</sub>O, 16 h., 70°C, 54%; e) Bpin<sub>2</sub>, KOAc, Pd(dppf)Cl<sub>2</sub>, DMF, 48 h., 85°C,  
199 74%;<sup>8</sup> f) KOAc, Pd(dppf)Cl<sub>2</sub>, THF/H<sub>2</sub>O, 16 h., 70°C, 59%.

200 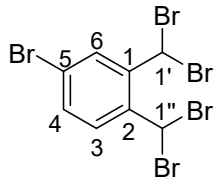 **4-bromo-1,2-bis(dibromomethyl)benzene.**<sup>3, 4</sup> 4-bromo-1,2-dimethylbenzene  
201 (3.00 mL, 22.21 mmol), *N*-bromosuccinimide (7.906 g, 44.42 mmol) and benzoyl  
202 peroxide (0.177 g, 0.73 mmol) were dissolved in carbon tetrachloride (1  
203 mL/mmol, 22.2 mL) under argon. The orange solution was heated to reflux. After  
204 2 hours, the solution was colourless with a white precipitate. The reaction was cooled to room  
205 temperature and additional *N*-bromosuccinimide (7.906 g, 44.42 mmol) and benzoyl peroxide (0.177  
206 g, 0.73 mmol) were added, and the reaction refluxed for another 18 h. The reaction was then cooled  
207 to room temperature and filtered. The white solid was washed with a small volume of CH<sub>2</sub>Cl<sub>2</sub> (10 mL),  
208 and the combined organic layers were washed with water (30 mL), saturated sodium thiosulfate (30  
209 mL) and brine (30 mL). The organic layer was dried with MgSO<sub>4</sub>, filtered and concentrated *in vacuo*.  
210 The product was recrystallised from petroleum ether/CH<sub>2</sub>Cl<sub>2</sub> (95/5, v/v) to afford the product (9.651  
211 g, 87%) as a white crystalline solid. *R*<sub>f</sub> (85/15, Petroleum Ether/Ethyl Acetate, v/v) = 0.66; IR (film)  $\tilde{\nu}$  =  
212 3047, 3006, 1585, 662, 573 cm<sup>-1</sup>; <sup>1</sup>H NMR (600 MHz, CDCl<sub>3</sub>, 45°C)  $\delta$  7.83 (broad s, 1H, H-6), 7.57 (broad  
213 s, 1H, H-3), 7.50 (dd, *J*<sub>3,4</sub> = 8.5 Hz, *J*<sub>4,6</sub> = 2.0 Hz, 1H, H-4), 7.06 (broad s, 1H, H-1'/H-1''), 7.02 (broad s,  
214 1H, H-1'/H-1''); <sup>13</sup>C NMR (150 MHz, CDCl<sub>3</sub>, 45°C)  $\delta$  139.3 (broad, C-1), 136.8 (broad, C-2), 133.7 (C-4),  
215 132.4 (broad, C-6), 131.3 (broad, C-3), 124.3 (C-5), 35.2 (C-1'/C-1''), 34.8 (C-1'/C-1''); Mp. 105.2 –  
216 106.3°C.

217 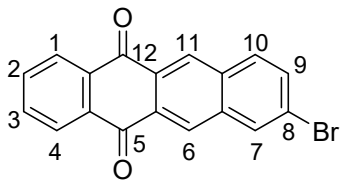 **8-bromotetracene-5,12-dione.**<sup>5</sup> 4-bromo-1,2-  
218 bis(dibromomethyl)benzene (2.000 g, 3.99 mmol) and 1,4-  
219 naphthoquinone (0.897 g, 5.67 mmol) were dissolved in  
220 dimethylformamide (8.5 mL/mmol, 33.8 mL) under argon. The solution  
221 was heated to 80°C, potassium iodide (6.291 g, 37.9 mmol) added, and the reaction stirred for 64  
222 hours. The reaction solution was cooled to room temperature, and the precipitate filtered and washed  
223 with CH<sub>3</sub>OH (30 mL) and water (30 mL). The solid was recrystallised from toluene to yield the desired  
224 product (1.0286 g, 76%) as a gold crystalline solid. The poor solubility of the compound limited the  
225 ability to obtain NMR data. *R*<sub>f</sub> (80/20, Petroleum Ether/Ethyl Acetate, v/v) = 0.47; IR (film)  $\tilde{\nu}$  = 3065,  
226 1667, 1579, 704 cm<sup>-1</sup>; HRMS (ESI) *m/z* calcd. for [C<sub>18</sub>H<sub>10</sub>BrO<sub>2</sub>]<sup>+</sup>:  
227 336.9859, obsd.: 336.9859; Mp. >260°C.

228 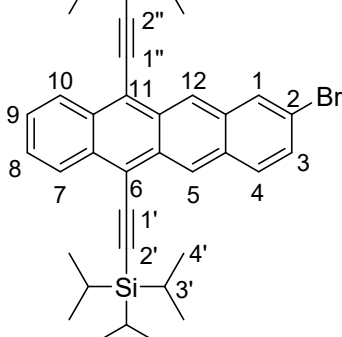 **2-bromo-6,11-bis(2-[triisopropylsilyl]ethynyl)tetracene.**<sup>6, 7</sup>  
229 Triisopropylsilyl acetylene (1.49 mL, 6.66 mmol) was dissolved in THF  
230 (1.3 mL/mmol, 8.9 mL) under an argon atmosphere and cooled to -

231 78°C. *n*-Butyllithium (2M in cyclohexane, 3.33 mL, 6.66 mmol) was added dropwise. The solution was  
 232 then warmed to 0°C and stirred for 1 hour. 8-bromotetracene-5,12-dione (0.750 g, 2.22 mmol) was  
 233 added to the reaction mixture and the resulting slurry stirred for 16 hours at room temperature under  
 234 argon. 10% aqueous HCl, saturated with SnCl<sub>2</sub>·2H<sub>2</sub>O (20 mL) was added to the reaction, and the  
 235 resulting red solution was stirred for 2 hours at room temperature. The solution was partitioned  
 236 between DCM (25 mL) and water (25 mL), and the aqueous layer was further extracted with DCM (3  
 237 x 10mL). The combined organic layers were dried with MgSO<sub>4</sub>, filtered and concentrated. The crude  
 238 product was purified with silica gel column chromatography using petroleum ether as the eluting  
 239 solvent. Recrystallisation from ethanol afforded dark red crystals of the product (1.2009 g, 81%). *R*<sub>f</sub>  
 240 (Petroleum Ether) = 0.68; IR (film)  $\tilde{\nu}$  = 2940, 2861, 2147, 2120, 1454, 1381, 670 cm<sup>-1</sup>; <sup>1</sup>H NMR (500  
 241 MHz, CDCl<sub>3</sub>)  $\delta$  9.32 (s, 1H, H-5), 9.24 (s, 1H, H-12), 8.67 (m, 2H, H-7, H-10), 8.21 (s, 1H, H-1), 7.92 (d,  
 242 *J*<sub>3,4</sub> = 9.1 Hz, 1H, H-4), 7.61 (m, 2H, H-8, H-9), 7.53 (dd, *J*<sub>3,4</sub> = 9.1 Hz, *J*<sub>1,3</sub> = 1.8 Hz, 1H, H-3), 1.35 (m, 42H,  
 243 H-3', H-4'. H-3'', H-4''); <sup>13</sup>C NMR (125 MHz, CDCl<sub>3</sub>)  $\delta$  133.2 (C-6a/C-10a), 132.9 (C-6a/C-10a), 132.8 (C-  
 244 12a), 130.8 (C-11a), 130.50 (C-5a), 130.46 (C-4), 130.32 (C-4a), 130.26 (C-1), 129.7 (C-3), 127.58 (C-  
 245 7/C-10), 127.55 (C-7/C-10), 127.2 (C-8/C-9), 127.1 (C-8/C-9), 127.0 (C-5), 125.6 (C-12), 120.4 (C-2),  
 246 119.0 (C-6), 118.8 (C-11), 106.5 (C-2'/C-2''), 106.4 (C-2'/C-2''), 103.80 (C-1'/C-1''), 103.78 (C-1'/C-1''),  
 247 19.1 (C-4', C-4''), 11.7 (C-3', C-3''); UV-Vis (CH<sub>2</sub>Cl<sub>2</sub>)  $\lambda$ , nm ( $\epsilon$ , M<sup>-1</sup>cm<sup>-1</sup>) = 467.5 (2453), 499.5 (6216), 536  
 248 (9438); Fluorescence (CH<sub>2</sub>Cl<sub>2</sub>,  $\lambda_{\text{ex}}$  = 536 nm)  $\lambda_{\text{max}}$  = 583 nm; HRMS(ESI) *m/z* calcd. for [C<sub>40</sub>H<sub>51</sub>BrSi<sub>2</sub>]<sup>+</sup>:  
 249 666.2707, obsd.: 666.2710; mp. 155.3 – 156.8°C.

250  
 251  
 252  
 253  
 254  
 255  
 256  
 257  
 258

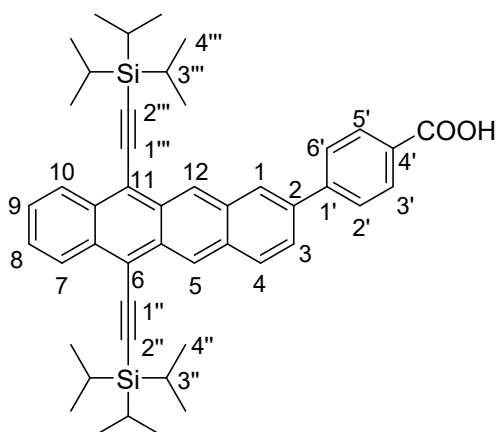

**2-(4-carboxyphenyl)-6,11-bis(2-**

**[triisopropylsilyl]ethynyl)tetracene.** 2-bromo-6,11-bis(2-  
 [triisopropylsilyl]ethynyl)tetracene (0.100 g, 0.15 mmol),  
 4-carboxyphenylboronic acid (0.125 g, 0.75 mmol) and  
 potassium carbonate (0.352 g, 2.55 mmol) were dissolved  
 in a 10:1 THF:H<sub>2</sub>O solution (160 mL/mmol, 24 mL) under  
 an argon atmosphere. [1,1'-  
 Bis(diphenylphosphino)ferrocene]dichloro palladium(II)  
 (10 mol%, 11 mg) was added, and the reaction mixture

259 heated to 70°C for 16 hours. The reaction was concentrated to remove the THF, and the resulting  
 260 aqueous layer was extracted with CH<sub>2</sub>Cl<sub>2</sub> (2 x 10 mL). The combined organic layers were washed with  
 261 H<sub>2</sub>O (20 mL) and brine (20 mL), then dried with MgSO<sub>4</sub>, filtered and concentrated. The residue was  
 262 purified using silica gel column chromatography (90/9.5/0.5, Petroleum Ether/Ethyl Acetate/Acetic  
 263 Acid, v/v/v) to afford the product as a dark red crystalline solid (0.057 g, 54%). *R*<sub>f</sub> (70/30, Petroleum  
 264 Ether/Ethyl Acetate, v/v) = 0.51; IR (film)  $\tilde{\nu}$  = 2940, 2862, 2145, 2122, 1684, 1292 cm<sup>-1</sup>; <sup>1</sup>H NMR (500

265 MHz, Pyridine-*d*<sub>5</sub>) δ 9.77 (s, 1H, H-12), 9.69 (s, 1H, H-5), 9.00 (m, 2H, H-7, H-10), 8.61 (m, 3H, H-1, H-3',  
 266 H-5'), 8.39 (d, *J*<sub>3,4</sub> = 9.0 Hz, 1H, H-4), 8.08 (d, *J*<sub>2',3'</sub> = *J*<sub>5',6'</sub> = 8.3 Hz, 2H, H-2', H-6'), 8.00 (dd, *J*<sub>3,4</sub> = 9.0 Hz,  
 267 *J*<sub>1,3</sub> = 1.3 Hz, 1H, H-3), 7.75 (m, 2H, H-8, H-9), 1.38 (m, 42H, H-3'', H-4'', H-3''', H-4'''); <sup>13</sup>C NMR (125  
 268 MHz, Pyridine-*d*<sub>5</sub>) δ 169.4 (COOH), 145.1 (C-1'), 138.7 (C-2), 133.8 (C-6a/C-10a), 133.7 (C-6a/C-10a),  
 269 133.4 (C-12a), 132.6 (C-4a), 132.4 (C-4'), 131.54 (C-5a), 131.51 (C-3', C-5'), 131.4 (C-11a), 130.3 (C-4),  
 270 128.3 (C-8, C-9), 128.2 (C-7, C-10), 128.1 (C-2', C-6'), 127.8 (C-12), 127.4 (C-3), 127.3 (C-1), 127.1 (C-5),  
 271 119.6 (C-6), 119.5 (C-11), 107.6 (C-2''/C-2'''), 107.4 (C-2''/C-2'''), 104.8 (C-1'', C-1'''), 19.5 (C-4'', C-4'''),  
 272 12.2 (C-3'', C-3'''); UV-Vis (CH<sub>2</sub>Cl<sub>2</sub>) λ, nm (ε, M<sup>-1</sup>cm<sup>-1</sup>) = 446 (2317), 473 (6318), 506 (14111), 543  
 273 (20640); Fluorescence (CH<sub>2</sub>Cl<sub>2</sub>, λ<sub>ex</sub> = 380 nm) λ<sub>max</sub> = 595 nm; HRMS(ESI) *m/z* calcd. for [C<sub>47</sub>H<sub>57</sub>O<sub>2</sub>Si<sub>2</sub>]<sup>+</sup>:  
 274 709.3892, obsd.: 709.3895; mp. >260°C.

275 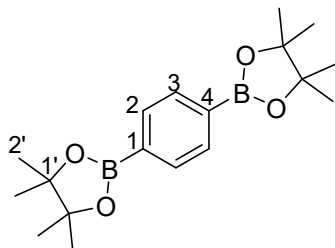 **1,4-bis(4,4,5,5-tetramethyl-1,3,2-dioxaborolan-2-yl)benzene.**<sup>8</sup> 1,4-  
 276 dibromobenzene (2.48 g, 10.5 mmol), bis(pinacolato)diboron (8.00 g,  
 277 31.5 mmol) and potassium acetate (6.19 g, 63.1 mmol) were dissolved  
 278 in DMF (7 mL/mmol, 73.5 mL) under an argon atmosphere. . [1,1'-  
 279 Bis(diphenylphosphino)ferrocene]dichloro palladium(II) (0.462 g, 6  
 280 mol%) was added to this solution, and the reaction heated to 85°C for 48 hours. The reaction mixture  
 281 was cooled to room temperature, added to water (100 mL) and extracted with CH<sub>2</sub>Cl<sub>2</sub> (3 x 125 mL).  
 282 The combined organic layers were washed with water (150 mL) and brine (150 mL), dried over MgSO<sub>4</sub>,  
 283 filtered and concentrated under reduced pressure. The crude product was purified by silica gel column  
 284 chromatography (95/5, Petroleum Ether/Ethyl Acetate, v/v), affording the product as a white solid  
 285 (2.55 g, 74%). *R*<sub>f</sub> (90/10, Petroleum Ether/Ethyl Acetate, v/v) = 0.46; IR (film)  $\tilde{\nu}$  = 2975, 2932, 1606,  
 286 1370, 1098 cm<sup>-1</sup>; <sup>1</sup>H NMR (500 MHz, CDCl<sub>3</sub>) δ 7.80 (s, 4H, H-2, H-3), 1.35 (s, 24H, H-2'). <sup>13</sup>C NMR (125  
 287 MHz, CDCl<sub>3</sub>) δ 134.0 (C-2, C-3), 131.8 (C-1, C-4, observed by HMBC), 84.0 (C-1'), 25.0 (C-2'). HRMS (ESI)  
 288 *m/z* calcd. for [C<sub>18</sub>H<sub>29</sub>B<sub>2</sub>O<sub>4</sub>]<sup>+</sup>: 331.2247, obsd.: 331.2245; mp. 229.8 – 231.2°C.

289 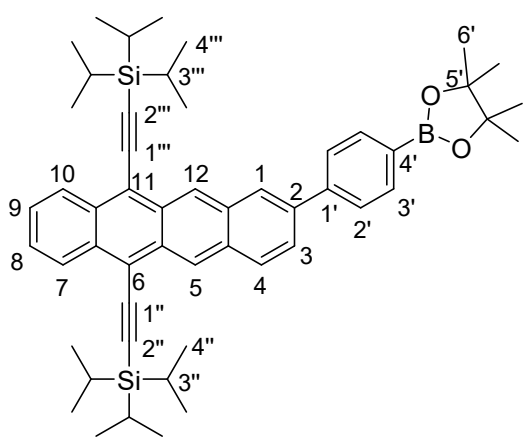 **2-(4-[4,4,5,5-tetramethyl-1,3,2-dioxaborolan-2-yl]phenyl)-6,11-bis(2-  
 290 [triisopropylsilyl]ethynyl)tetracene.** 2-bromo-6,11-  
 291 bis(2-[triisopropylsilyl]ethynyl)tetracene (0.150 g, 0.23  
 292 mmol), 1,4-bis(4,4,5,5-tetramethyl-1,3,2-dioxaborolan-  
 293 2-yl)benzene (0.149 g, 0.45 mmol) and potassium  
 294 acetate (0.153 g, 1.56 mmol) were dissolved in a THF  
 295 (100 mL/mmol, 22.5 mL) and H<sub>2</sub>O (3.5 mL/mmol, 0.79  
 296 mL) solution under an argon atmosphere. [1,1'-  
 297 Bis(diphenylphosphino)ferrocene]dichloro palladium(II) (16.8 mg, 10 mol%) was added, and the  
 298

299 reaction mixture heated to 70°C for 16 hours. The reaction was concentrated to remove the THF, and  
 300 the resulting aqueous layer was extracted with CH<sub>2</sub>Cl<sub>2</sub> (2 x 10 mL). The combined organic layers were  
 301 washed with H<sub>2</sub>O (20 mL) and brine (20 mL), then dried with MgSO<sub>4</sub>, filtered and concentrated. The  
 302 residue was purified using silica gel column chromatography (70/30, Petroleum Ether/CH<sub>2</sub>Cl<sub>2</sub>, v/v) to  
 303 afford the product as a dark red crystalline solid (0.105 g, 59%). R<sub>f</sub> (70/30, Petroleum Ether/CH<sub>2</sub>Cl<sub>2</sub>,  
 304 v/v) = 0.68; IR (film)  $\tilde{\nu}$  = 2941, 2863, 2147, 2120, 1608, 1461, 1358, 1270 cm<sup>-1</sup>; <sup>1</sup>H NMR (500 MHz,  
 305 CDCl<sub>3</sub>)  $\delta$  9.36 (s, 1H, H-12), 9.32 (s, 1H, H-5), 8.63 (m, 2H, H-7, H-10), 8.20 (s, 1H, H-1), 8.10 (d,  $J_{3,4}$  = 8.9  
 306 Hz, 1H, H-4), 7.99 (d,  $J_{2,3'}$  = 8.2 Hz, 2H, H-3'), 7.81 (d,  $J_{2,3'}$  = 8.2 Hz, 2H, H-2'), 7.78 (dd,  $J_{3,4}$  = 8.9 Hz,  $J_{1,3}$   
 307 = 1.6 Hz, 1H, H-3), 7.55 (m, 2H, H-8, H-9), 1.39 (s, 12H, H-6'), 1.33 (m, 42H, H-3'', H-4'', H-3''', H-4''');  
 308 <sup>13</sup>C NMR (125 MHz, CDCl<sub>3</sub>)  $\delta$  143.7 (C-1'), 138.4 (C-2), 135.6 (C-3'), 132.9 (C-6a/C-10a), 132.8 (C-6a/C-  
 309 10a), 132.4 (C-12a), 131.6 (C-4a), 130.8 (C-11a), 130.7 (C-5a), 129.4 (C-4), 128.1 (C-4', observed by  
 310 HMBC), 127.6 (C-7, C-10), 126.90 (C-8, C-9), 126.87 (C-12), 126.8 (C-2'), 126.41 (C-3), 126.39 (C-1),  
 311 126.3 (C-5), 118.8 (C-6), 118.7 (C-11), 106.2 (C-2''/C-2'''), 106.0 (C-2''/C-2'''), 104.0 (C-1'', C-1'''), 84.0  
 312 (C-5'), 25.0 (C-6'), 19.1 (C-4'', C-4'''), 11.7 (C-3'', C-3'''); UV-Vis (CH<sub>2</sub>Cl<sub>2</sub>)  $\lambda$ , nm ( $\epsilon$ , M<sup>-1</sup>cm<sup>-1</sup>) = 474 (11149),  
 313 508 (20705), 544 (30262); Fluorescence (CH<sub>2</sub>Cl<sub>2</sub>,  $\lambda_{\text{ex}}$  = 380 nm)  $\lambda_{\text{max}}$  = 554 nm; HRMS (ESI)  $m/z$  calcd.  
 314 for [C<sub>52</sub>H<sub>68</sub>BO<sub>2</sub>Si<sub>2</sub>]<sup>+</sup>: 791.4845, obsd.: 791.4843; mp. 226.5 – 228.2°C.

#### 315 1.4 Pentacene Precursor Synthesis

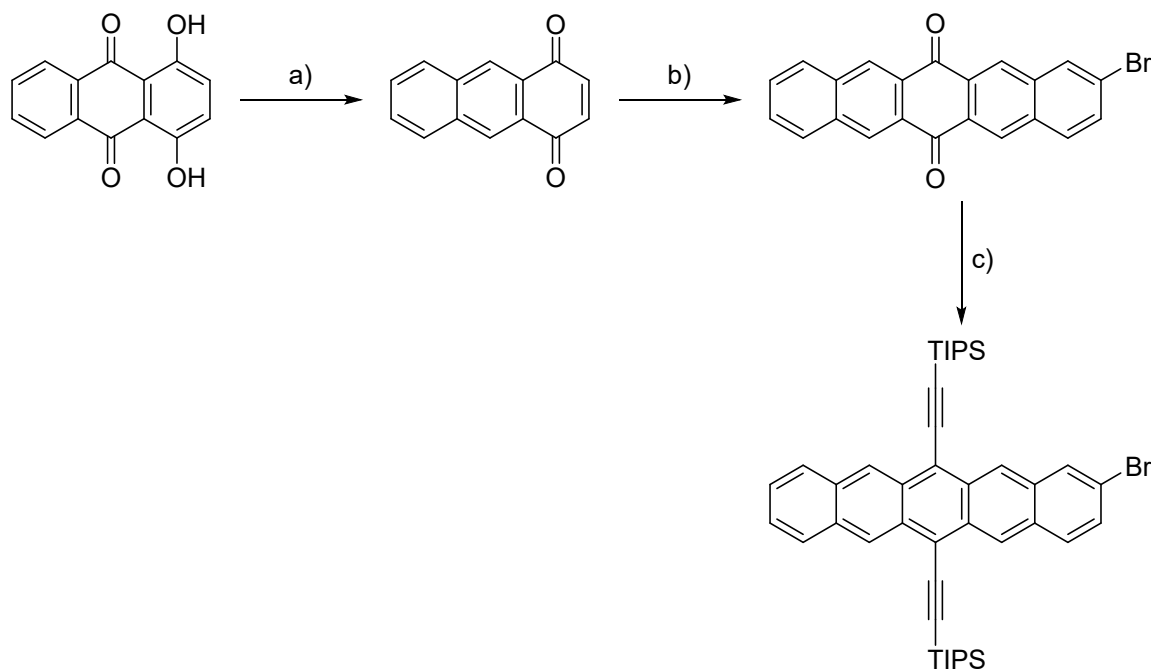

316

317 Scheme S3. Synthesis of the pentacene precursor used. Conditions: a) NaBH<sub>4</sub>, MeOH, 20 min., 0°C,  
 318 then 15 h., r.t., then HCl, 81%;<sup>3</sup> b) KI, DMF, 110°C, 20 h., 78%;<sup>3</sup> c) TIPS-acetylene, *n*-  
 319 BuLi, 30 min., 0°C, then 2-bromopentacene-6,13-dione, 16 h., r.t., then HCl,  
 320 SnCl<sub>2</sub>·2H<sub>2</sub>O, H<sub>2</sub>O, 2 h., r.t., 72%.<sup>3</sup>

321  
322  
323  
324

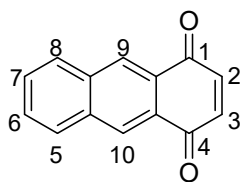

**1,4-antraquinone.**<sup>3</sup> Quinizarin (1.00 g, 4.16 mmol) was dissolved in methanol (5 mL/mmol, 20.8 mL) at 0°C under an argon atmosphere. Sodium borohydride (0.63 g, 16.6 mmol) was added to this portionwise over 20 minutes. The reaction was warmed to room temperature, and stirred for 15 hours. 6M aqueous HCl (14 mL) was added, and the precipitate filtered and washed with water. The product was dissolved in CHCl<sub>3</sub> and dried with MgSO<sub>4</sub>, filtered and concentrated *in vacuo* to afford the product as a red solid (0.706g, 81%). *R<sub>f</sub>* (CH<sub>2</sub>Cl<sub>2</sub>) = 0.50; IR (film)  $\tilde{\nu}$  = 3051, 1665, 1614, 1294 cm<sup>-1</sup>; <sup>1</sup>H NMR (500 MHz, CDCl<sub>3</sub>)  $\delta$  8.64 (s, 2H, H-9, H-10), 8.08 (m, 2H, H-5, H-8), 7.71 (m, 2H, H-6, H-7), 7.08 (s, 2H, H-2, H-3); <sup>13</sup>C NMR (125 MHz, CDCl<sub>3</sub>)  $\delta$  184.9 (C-1, C-4), 140.3 (C-2, C-3), 135.0 (C-8a, C-10a), 130.4 (C-5, C-8), 129.8 (C-6, C-7), 129.1 (C-9, C-10), 128.6 (C-4a, C-9a); UV-Vis (CH<sub>2</sub>Cl<sub>2</sub>)  $\lambda$ , nm ( $\epsilon$ , M<sup>-1</sup>cm<sup>-1</sup>) = 409 (4716); HRMS (ESI) *m/z* calcd. for [C<sub>14</sub>H<sub>9</sub>O<sub>2</sub>]<sup>+</sup>: 209.0597, obsd.: 209.0597; mp. 215.5 – 216.7°C.

332  
333  
334  
335

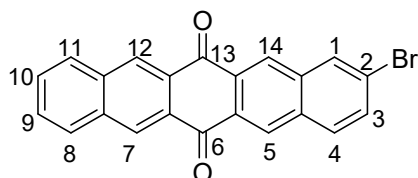

**2-bromopentacene-6,13-dione.**<sup>3</sup> 4-bromo-1,2-bis(dibromomethyl)benzene (2.25 g, 4.49 mmol) and 1,4-antraquinone (0.8891 g, 4.27 mmol) were dissolved in dimethylformamide (8.0 mL/mmol, 35.9 mL) under argon. The solution was heated to 110°C, potassium iodide (2.98 g, 18.0 mmol) added, and the reaction stirred for 20 hours. The reaction solution was cooled to 0°C, and the precipitate filtered and washed with CH<sub>3</sub>OH (30 mL) and water (30 mL). The product was afforded as a gold solid (1.36 g, 78%). The poor solubility of the compound limited the ability to obtain NMR data. *R<sub>f</sub>* (CH<sub>2</sub>Cl<sub>2</sub>) = 0.76; IR (film)  $\tilde{\nu}$  = 3049, 1673, 1609, 1307, 751 cm<sup>-1</sup>; UV-Vis (CH<sub>3</sub>C<sub>6</sub>H<sub>5</sub>)  $\lambda$ , nm ( $\epsilon$ , M<sup>-1</sup>cm<sup>-1</sup>) = 306 (13728), 385 (3015), 403 (3492); HRMS (ESI) *m/z* calcd. for [C<sub>22</sub>H<sub>12</sub>BrO<sub>2</sub>]<sup>+</sup>: 387.0015, obsd.: 387.0017; mp. >260°C.

342  
343  
344  
345  
346  
347  
348  
349

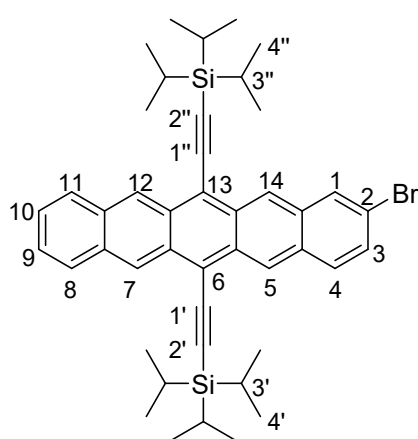

**2-bromo-6,13-bis(2-[triisopropylsilyl]ethynyl)pentacene.**<sup>3</sup> Triisopropylsilyl acetylene (1.23 mL, 5.47 mmol) was dissolved in THF (1.6 mL/mmol, 8.8 mL) under an argon atmosphere and cooled to 0°C. *n*-Butyllithium (2M in cyclohexane, 2.63 mL, 5.26 mmol) was added dropwise. The solution was then stirred at 0°C for 30 minutes. 2-bromopentacene-6,13-dione (0.700 g, 1.81 mmol) was added in one portion to the acetylide solution. The reaction was stirred for 16 hours at room temperature. 10% aqueous HCl, saturated with SnCl<sub>2</sub>·2H<sub>2</sub>O (3 mL) was added to the reaction, and the resulting blue solution was stirred for one hour at room temperature. Saturated NH<sub>4</sub>Cl solution was added to the solution, and the mixture extracted with CH<sub>2</sub>Cl<sub>2</sub> (3 x 50 mL). The combined extracts were dried with MgSO<sub>4</sub>, filtered, and concentrated *in vacuo*. The crude concentrate was purified using silica gel column

354 chromatography (Petroleum Ether) to afford the product as a blue crystalline solid (0.940 g, 72%).  $R_f$   
355 (Petroleum Ether) = 0.47; IR (film)  $\tilde{\nu}$  = 3046, 2940, 2862, 2133, 1615, 1461, 1368, 742  $\text{cm}^{-1}$ ;  $^1\text{H}$  NMR  
356 (500 MHz,  $\text{CDCl}_3$ )  $\delta$  9.30 (m, 2H, H-7, H-12), 9.27 (s, 1H, H-5), 9.19 (s, 1H, H-14), 8.13 (d,  $J_{1,3}$  = 1.6 Hz,  
357 1H, H-1), 7.98 (m, 2H, H-8, H-11), 7.84 (d,  $J_{3,4}$  = 9.1 Hz, 1H, H-4), 7.44 (m, 3H, H-3, H-9, H-10), 1.37 (m,  
358 42H, H-3', H-4', H-3'', H-4'');  $^{13}\text{C}$  NMR (125 MHz,  $\text{CDCl}_3$ )  $\delta$  132.8 (C-14a), 132.6 (C-7a/C-11a), 132.5 (C-  
359 7a/C-11a), 131.0 (C-6a/C-12a), 130.9 (C-6a/C-12a), 130.8 (C-5a), 130.7 (C-13a), 130.6 (C-4), 130.4 (C-  
360 4a), 130.3 (C-1), 129.7 (C-3), 128.8 (C-8, C-11), 127.0 (C-5), 126.55 (C-7/ C-12), 126.51 (C-7/C-12), 126.4  
361 (C-9/C-10), 126.3 (C-9/C-10), 125.6 (C-14), 120.4 (C-2), 118.8 (C-6), 118.6 (C-13), 107.8 (C-2'/C-2''),  
362 107.7 (C-2'/C-2''), 104.6 (C-1'/C-1''), 104.5 (C-1'/C-1''), 19.2 (C-4'/C-4''), 19.1 (C-4'/C-4''), 11.8 (C-3', C-  
363 3''); UV-Vis ( $\text{CH}_2\text{Cl}_2$ )  $\lambda$ , nm ( $\epsilon$ ,  $\text{M}^{-1}\text{cm}^{-1}$ ) = 417 (3626), 443 (6043), 552 (6285), 592 (14503), 644 (26348);  
364 Fluorescence ( $\text{C}_6\text{H}_5\text{CH}_3$ ,  $\lambda_{\text{ex}}$  = 595 nm)  $\lambda_{\text{max}}$  = 652 nm; HRMS (ESI)  $m/z$  calcd. for  $[\text{C}_{44}\text{H}_{54}\text{BrSi}_2]^+$ : 717.2942,  
365 obsd.: 717.2943; mp. 255.9 – 256.9°C.

366 1.5 **Synthesis of Dyads 4 – 7**

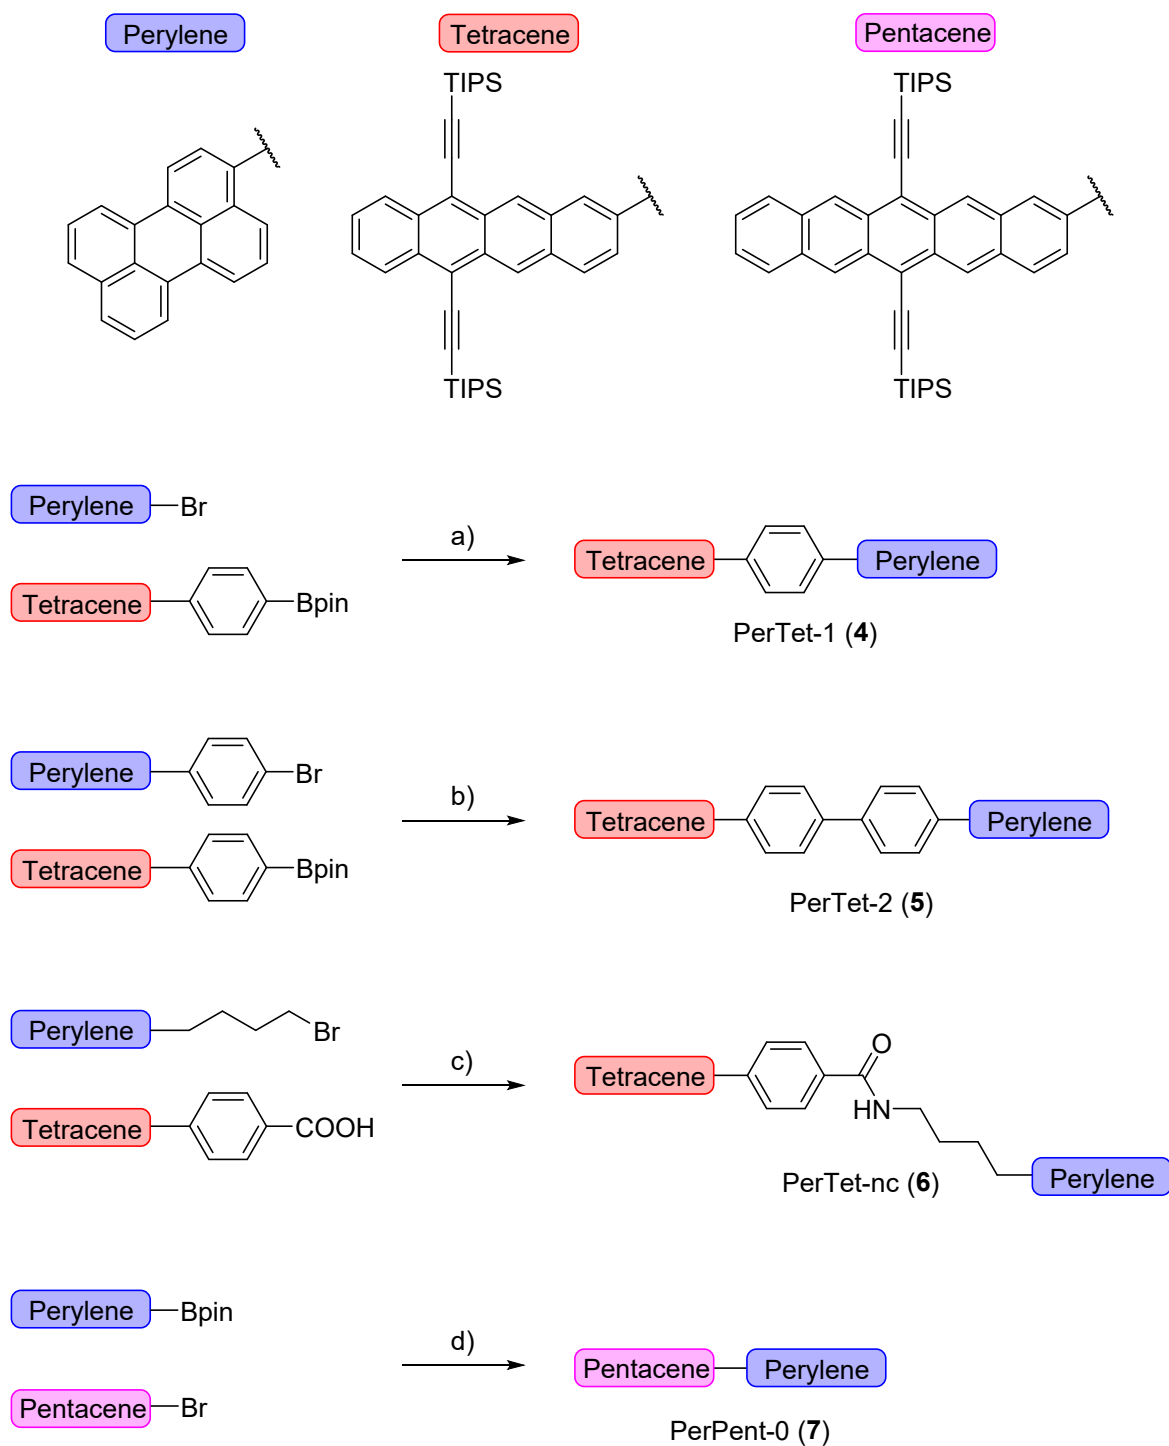

367

368 Scheme S4. Synthesis of the tuneable dyes. Conditions: a) KOAc, Pd(dppf)Cl<sub>2</sub>, THF/H<sub>2</sub>O, 16 h., 70°C, 45%; b) KOAc, Pd(dppf)Cl<sub>2</sub>, THF/H<sub>2</sub>O, 16 h., 70°C, 43%; c) HOBT, DIPEA, DMF, 16 h., r.t., 38%; d) KOAc, Pd(dppf)Cl<sub>2</sub>, THF/H<sub>2</sub>O, 16 h., 70°C, 65%.

370

371

372 **1-(6,11-bis[[triisopropylsilyl]ethynyl]tetracen-2-yl)-4-(perylene-3-yl)benzene (PerTet-1) (4).**

373

374

375

376

377

378

379

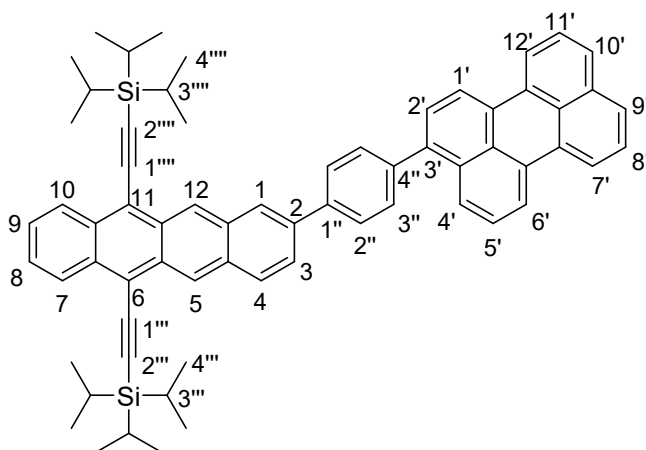

380 2-(4-[4,4,5,5-tetramethyl-1,3,2-dioxaborolan-2-yl]phenyl)-6,11-bis(2-[triisopropylsilyl]ethynyl)

381 tetracene (81.5 mg, 0.10 mmol), 3-bromoperylene (68.2 mg, 0.20 mmol) and potassium acetate (70.2

382 mg, 0.72 mmol) were dissolved in a 30:1 THF:H<sub>2</sub>O solution (110 mL/mmol, 11.1 mL) under an argon

383 atmosphere. [1,1'-Bis(diphenylphosphino)ferrocene]dichloro palladium(II) (10 mol%, 7.3 mg) was

384 added, and the reaction mixture heated to 70°C for 16 hours. The reaction was concentrated to

385 remove the THF, and the resulting aqueous layer was extracted with CH<sub>2</sub>Cl<sub>2</sub> (2 x 5 mL). The combined

386 organic layers were washed with H<sub>2</sub>O (5 mL) and brine (5 mL), then dried with MgSO<sub>4</sub>, filtered and

387 concentrated. The residue was purified using silica gel column chromatography (75/25, Petroleum

388 Ether/CH<sub>2</sub>Cl<sub>2</sub>, v/v) to afford **4** as an orange crystalline solid (41.2 mg, 45%). R<sub>f</sub> (75/25, Petroleum

389 Ether/CH<sub>2</sub>Cl<sub>2</sub>, v/v) = 0.68; IR (film)  $\tilde{\nu}$  = 3053, 2939, 2889, 2862, 2145, 2118, 1459, 1383 cm<sup>-1</sup>; <sup>1</sup>H NMR

390 (600 MHz, CDCl<sub>3</sub>)  $\delta$  9.39 (s, 1H, H-12), 9.35 (s, 1H, H-5), 8.64 (m, 2H, H-7, H-10), 8.30 (m, 2H, H-1, H-

391 4'), 8.25 (m, 3H, H-6', H-7', H-12'), 8.15 (d,  $J_{3,4}$  = 8.8 Hz, 1H, H-4), 7.96 (d,  $J_{2'',3''}$  = 8.2 Hz, 2H, H-2''), 7.91

392 (d,  $J_{1',2'}$  = 8.3 Hz, 1H, H-1'), 7.87 (dd,  $J_{3,4}$  = 8.8 Hz,  $J_{1,3}$  = 1.8 Hz, 1H, H-3), 7.71 (m, 4H, H-9', H-10', H-3''),

393 7.57 (m, 2H, H-8, H-9), 7.51 (m, 4H, H-2', H-5', H-8', H-11'), 1.34 (m, 42H, H-3''', H-4''', H-3''''', H-4''''');

394 <sup>13</sup>C NMR (150 MHz, CDCl<sub>3</sub>)  $\delta$  (Assigned by HMBC) 140.3 (C-4''), 140.0 (C-1''), 139.6 (C-3'), 138.1 (C-2),

395 134.9 (C-9'a), 133.1 (C-3'a), 132.9 (C-6a/C-10a), 132.8 (C-6a/C-10a), 132.5 (C-12a), 131.7 (C-6'a/C-

396 12'b), 131.6 (C-4a), 131.4 (C-6'a/C-12'b), 131.1 (C-6'b, C-12'a), 130.8 (C-11a, C-3''), 130.7 (C-5a), 129.5

397 (C-4), 129.3 (C-3'a<sup>1</sup>), 128.8 (C-6'b<sup>1</sup>), 128.02 (C-9', C-10'), 127.97 (C-2'/C-5'), 127.8 (C-2'/C-5'), 127.6 (C-

398 7, C-10), 127.5 (C-2''), 126.94 (C-8/C-9), 126.88 (C-8/C-9), 126.82 (C-8', C-11'), 126.77 (C-12), 126.4 (C-

399 3), 126.3 (C-5), 126.2 (C-1'), 126.0 (C-1), 120.61 (C-12'), 120.56 (C-7'), 120.4 (C-4'/C-6'), 120.2 (C-4'/C-

400 6'), 118.9 (C-6), 118.7 (C-11), 106.2 (C-2'''/C-2''''), 106.1 (C-2'''/C-2''''), 103.8 (C-1''', C-1''''), 19.1 (C-4''',

401 C-4''''), 11.8 (C-3''', C-3'''''); UV-Vis (C<sub>6</sub>H<sub>5</sub>CH<sub>3</sub>)  $\lambda$ , nm ( $\epsilon$ , M<sup>-1</sup>cm<sup>-1</sup>) = 425 (60379), 449 (74149), 506 (25140),



402 543 (35239); Fluorescence ( $C_6H_5CH_3$ ,  $\lambda_{ex} = 405$  nm)  $\lambda_{max} = 556$  nm; HRMS (ESI)  $m/z$  calcd. for  
403  $[C_{66}H_{66}Si_2]^{+}$ : 914.4698, obsd.: 914.4706; mp. 260.1 – 261.8°C.

404 **4-(6,11-bis[(triisopropylsilyl)ethynyl]tetracen-2-yl)-4'-(perylene-3-yl)-1,1'-biphenyl (PerTet-2) (5)**.

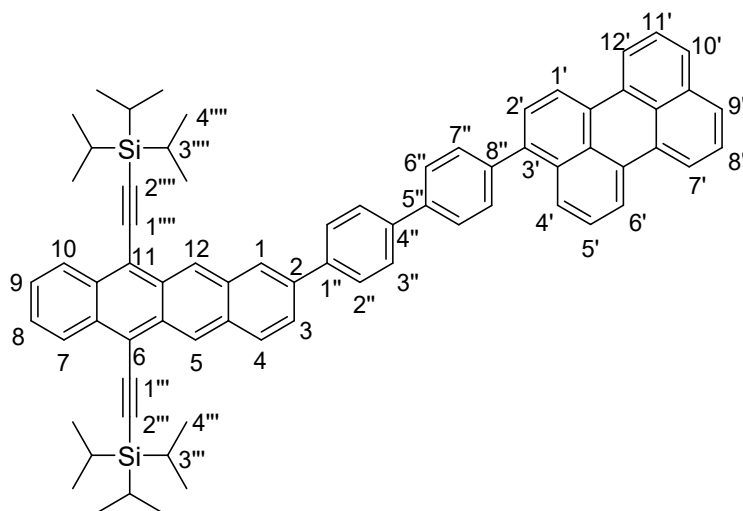

405

406 2-(4-[4,4,5,5-tetramethyl-1,3,2-dioxaborolan-2-yl]phenyl)-6,11-bis(2-[triisopropylsilyl]ethynyl)  
407 tetracene (47.5 mg, 60  $\mu$ mol), 3-(4-bromophenyl)perylene (39.9 mg, 98  $\mu$ mol) and potassium acetate  
408 (41.5 mg, 420  $\mu$ mol) were dissolved in a 30:1 THF:H<sub>2</sub>O solution (210 mL/mmol, 12.7 mL) under an  
409 argon atmosphere. [1,1'-Bis(diphenylphosphino)ferrocene]dichloro palladium(II) (10 mol%, 4.4 mg)  
410 was added, and the reaction mixture heated to 70°C for 16 hours. The reaction was concentrated to  
411 remove the THF, and the resulting aqueous layer was extracted with CH<sub>2</sub>Cl<sub>2</sub> (2 x 5 mL). The combined  
412 organic layers were washed with H<sub>2</sub>O (5 mL) and brine (5 mL), then dried with MgSO<sub>4</sub>, filtered and  
413 concentrated. The residue was purified using silica gel column chromatography (88/12, Petroleum  
414 Ether/CH<sub>2</sub>Cl<sub>2</sub>, v/v) to afford **5** as an orange crystalline solid (25.6 mg, 43%).  $R_f$  (75/25, Petroleum  
415 Ether/CH<sub>2</sub>Cl<sub>2</sub>, v/v) = 0.72; IR (film)  $\tilde{\nu} = 3046, 2939, 2888, 2860, 2124, 1460, 1385$  cm<sup>-1</sup>; <sup>1</sup>H NMR (600  
416 MHz, CDCl<sub>3</sub>)  $\delta$  9.38 (s, 1H, H-12), 9.34 (s, 1H, H-5), 8.64 (m, 2H, H-7, H-10), 8.29 (d,  $J_{4',5'} = 8.0$  Hz, 1H, H-  
417 4'), 8.25 (m, 4H, H-1, H-6', H-7', H-12'), 8.14 (d,  $J_{3,4} = 8.9$  Hz, 1H, H-4), 7.95 (d,  $J_{2'',3''} = 8.3$  Hz, 2H, H-2''),  
418 7.89 (m, 3H, H-1', H-3''), 7.84 (m, 3H, H-3, H-6''), 7.71 (d,  $J_{8',9'} = J_{10',11'} = 8.2$  Hz, 2H, H-9', H-10'), 7.67 (d,  
419  $J_{6'',7''} = 8.2$  Hz, 2H, H-7''), 7.56 (m, 2H, H-8, H-9), 7.51 (m, 4H, H-2', H-5', H-8', H-11'), 1.34 (m, 42H, H-  
420 3''', H-4''', H-3''', H-4'''); <sup>13</sup>C NMR (150 MHz, CDCl<sub>3</sub>)  $\delta$  (Assigned by HMBC) 140.2 (C-4''), 140.14 (C-8''),  
421 140.06 (C-1''), 139.8 (C-5''), 139.7 (C-3'), 137.9 (C-2), 134.9 (C-9'a), 133.1 (C-3'a), 132.9 (C-6a/C-10a),  
422 132.8 (C-6a/C-10a), 132.5 (C-12a), 131.8 (C-6'a/C-6'b/C-12'a/C-12'b), 131.74 (C-4a), 131.65 (C-6'a/C-  
423 6'b/C-12'a/C-12'b), 131.58 (C-6'a/C-6'b/C-12'a/C-12'b), 131.41 (C-6'a/C-6'b/C-12'a/C-12'b), 130.9 (C-  
424 11a), 130.68 (C-7''), 130.65 (C-5a), 129.5 (C-4), 129.3 (C-3'a<sup>1</sup>), 128.8 (C-6'b<sup>1</sup>), 128.0 (C-2', C-5', C-9', C-  
425 10'), 127.83 (C-2'', C-3''), 127.78 (C-7/C-10), 127.76 (C-7/C-10), 127.6 (C-3), 127.2 (C-6''), 126.9 (C-8, C-

426 9), 126.81 (C-8', C-11'), 126.78 (C-12), 126.3 (C-5, C-1'), 125.9 (C-1), 120.6 (C-12'), 120.5 (C-6'/C-7'),  
 427 120.3 (C-6'/C-7'), 120.1 (C-4'), 118.9 (C-6), 118.7 (C-11), 106.14 (C-2'''/C-2''''), 106.06 (C-2'''/C-2''''),  
 428 104.1 (C-1'''/C-1''''), 104.0 (C-1'''/C-1''''), 19.1 (C-4''', C-4''''), 11.8 (C-3''', C-3''''); UV-Vis (C<sub>6</sub>H<sub>5</sub>CH<sub>3</sub>) λ, nm  
 429 (ε, M<sup>-1</sup>cm<sup>-1</sup>) = 425 (52843), 450 (58777), 508 (25998), 545 (32497); Fluorescence (C<sub>6</sub>H<sub>5</sub>CH<sub>3</sub>, λ<sub>ex</sub> = 405  
 430 nm) λ<sub>max</sub> = 551 nm; HRMS (ESI) *m/z* calcd. for [C<sub>72</sub>H<sub>71</sub>Si<sub>2</sub>]<sup>+</sup>: 991.5089, obsd.: 991.5092; mp. >260°C.

431 **4-(6,11-bis[(triisopropylsilyl)ethynyl]tetracen-2-yl)-N-(4-[perylene-3-yl]butyl)benzamide (PerTet-nc)**  
 432 (6).

433

434

435

436

437

438

439

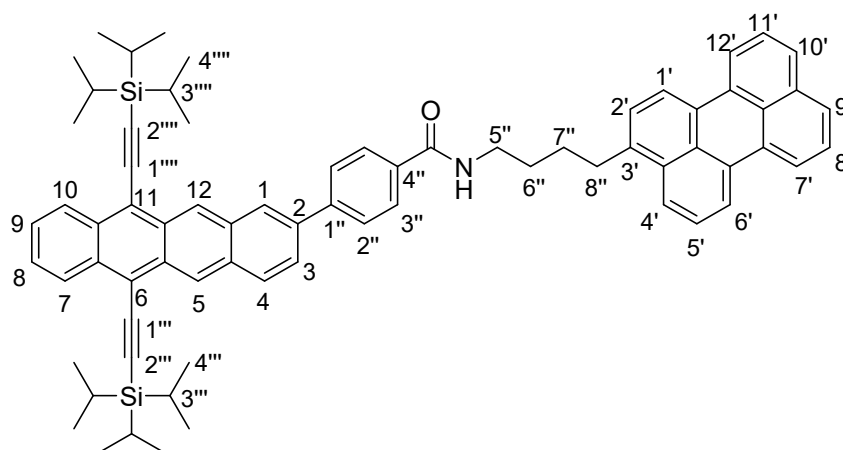

440 2-(4-carboxyphenyl)-6,11-bis(2-[triisopropylsilyl]ethynyl)tetracene (11.0 mg, 16 μmol) and 3-(4-  
 441 aminobutyl)perylene (5.8 mg, 18 μmol) were dissolved in DMF (4 mL) under an argon atmosphere.  
 442 HBTU (13.6 mg, 36 μmol) and DIPEA (50 μL, 0.29 mmol) were added to this, and the reaction stirred  
 443 for 16 hours at room temperature. The solution was partitioned between CH<sub>2</sub>Cl<sub>2</sub> (10 mL) and water  
 444 (10 mL). The organic layer was washed with brine (10 mL) before concentration. The crude residue  
 445 was purified using silica gel column chromatography, eluting with CH<sub>2</sub>Cl<sub>2</sub>. The product, **6**, was obtained  
 446 as an orange solid (6.1 mg, 38%). R<sub>f</sub> (CH<sub>2</sub>Cl<sub>2</sub>) = 0.41; IR (film)  $\tilde{\nu}$  = 3307, 3052, 2922, 2854, 1741, 1460  
 447 cm<sup>-1</sup>; <sup>1</sup>H NMR (600 MHz, CDCl<sub>3</sub>) δ 9.35 (s, 1H, H-12), 9.32 (s, 1H, H-5), 8.63 (m, 2H, H-7, H-10), 8.22 (d,  
 448 *J*<sub>5',6'</sub> = 7.6 Hz, 1H, H-6'), 8.19 (d, *J*<sub>7',8'</sub> = 7.6 Hz, 1H, H-7'), 8.17 (m, 2H, H-1, H-12'), 8.14 (d, *J*<sub>1',2'</sub> = 7.6 Hz,  
 449 1H, H-1'), 8.10 (d, *J*<sub>3,4</sub> = 8.9 Hz, 1H, H-4), 7.90 (d, *J*<sub>4',5'</sub> = 8.2 Hz, 1H, H-4'), 7.88 (d, *J*<sub>2'',3''</sub> = 8.3 Hz, 2H, H-  
 450 3''), 7.82 (d, *J*<sub>2'',3''</sub> = 8.3 Hz, 2H, H-2''), 7.71 (dd, *J*<sub>3,4</sub> = 8.9, *J*<sub>1,3</sub> = 1.6 Hz, 2H, H-3), 7.664 (d, *J*<sub>8',9'</sub> = *J*<sub>10',11'</sub> =  
 451 7.6 Hz, 1H, H-9'/H-10'), 7.656 (d, *J*<sub>8',9'</sub> = *J*<sub>10',11'</sub> = 8.0 Hz, 1H, H-9'/H-10'), 7.56 (m, 2H, H-8, H-9), 7.53 (dd,  
 452 *J*<sub>4',5'</sub> = 8.2 Hz, *J*<sub>5',6'</sub> = 7.6 Hz, 1H, H-5'), 7.47 (t, *J*<sub>7',8'</sub> = *J*<sub>8',9'</sub> = *J*<sub>10',11'</sub> = *J*<sub>11',12'</sub> = 7.6 Hz, 1H, H-8'/H-11'), 7.46 (t,  
 453 *J*<sub>7',8'</sub> = *J*<sub>8',9'</sub> = *J*<sub>10',11'</sub> = *J*<sub>11',12'</sub> = 7.6 Hz, 1H, H-8'/H-11'), 7.37 (d, *J*<sub>1',2'</sub> = 7.6 Hz, 1H, H-2'), 6.14 (t, *J*<sub>NH,5''</sub> = 6.0  
 454 Hz, 1H, NH), 3.58 (q, *J*<sub>5'',NH</sub> = *J*<sub>5'',6''</sub> = 6.0 Hz, 2H, H-5''), 3.12 (t, *J*<sub>7'',8''</sub> = 7.5 Hz, 2H, H-8''), 1.92 (m, 2H, H-  
 455 7''), 1.82 (m, 2H, H-6''), 1.33 (m, 42H, H-3''', H-4''', H-3''', H-4'''); <sup>13</sup>C NMR (150 MHz, CDCl<sub>3</sub>) δ (Assigned  
 456 by HMBC) 167.3 (CONH), 143.9 (C-1''), 138.2 (C-3'), 137.3 (C-2), 134.8 (C-9a), 133.7 (C-4''), 133.2 (C-

457 3'a), 133.0 (C-6a/C-10a), 132.9 (C-6a/C-10a), 132.2 (C-12a), 132.0 (C-6'a), 131.6 (C-6'b, C-12'a), 131.5  
 458 (C-4a), 130.8 (C-11a), 130.6 (C-5a), 129.9 (C-12'b), 129.6 (C-4), 129.3 (C-3'a<sup>1</sup>), 128.5 (C-6'b<sup>1</sup>, observed  
 459 by HMBC), 127.9 (C-9'/C-10'), 127.7 (C-3'''), 127.6 (C-7, C-10), 127.5 (C-2''), 127.21 (C-9'/C-10'), 127.16  
 460 (C-2'), 127.04 (C-8, C-9), 127.01 (C-12), 126.76 (C-8'/C-11'), 126.71 (C-8'/C-11'), 126.6 (C-1, C-5'), 126.4  
 461 (C-5), 125.9 (C-3), 123.9 (C-4'), 120.4 (C-6'), 120.3 (C-7'), 120.2 (C-1'), 119.9 (C-12'), 118.9 (C-6), 118.8  
 462 (C-11), 106.3 (C-2''', C-2''''), 104.1 (C-1''', C-1''''), 40.1 (C-5'''), 33.1 (C-8'''), 29.8 (C-6'''), 27.9 (C-7'''), 19.1  
 463 (C-4''', C-4''''), 11.7 (C-3''', C-3'''''); UV-Vis (C<sub>6</sub>H<sub>5</sub>CH<sub>3</sub>) λ, nm (ε, M<sup>-1</sup>cm<sup>-1</sup>) = 397 (26891), 419 (50794), 447  
 464 (64161), 506 (20286), 545 (28935); Fluorescence (C<sub>6</sub>H<sub>5</sub>CH<sub>3</sub>, λ<sub>ex</sub> = 405 nm) λ<sub>max</sub> = 549 nm; HRMS (ESI)  
 465 *m/z* calcd. for [C<sub>71</sub>H<sub>75</sub>NOSi<sub>2</sub>]<sup>+</sup>: 1014.5460, obsd.: 1014.5463.

466 **2-(perylene-3-yl)-6,13-bis(2-[triisopropylsilyl]ethynyl)pentacene (PerPent-0) (7).**

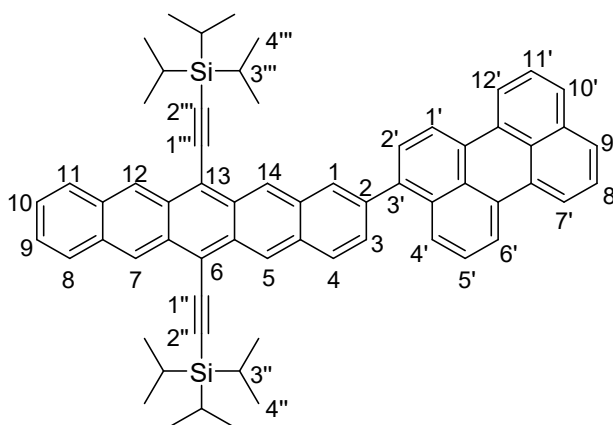

467

468 2-bromo-6,13-bis(2-[triisopropylsilyl]ethynyl)pentacene (8.5 mg, 11.8 μmol), 4,4,5,5-tetramethyl-2-  
 469 (perylene-3-yl)-1,3,2-dioxaborolane (3.8 mg, 10.0 μmol) and potassium acetate (6.8 mg, 69.0 μmol)  
 470 were dissolved in a 30:1 THF:H<sub>2</sub>O solution (110 mL/mmol, 1.1 mL) under an argon atmosphere. [1,1'-  
 471 Bis(diphenylphosphino)ferrocene]dichloro palladium(II) (10 mol%, 0.7 mg) was added, and the  
 472 reaction mixture heated to 70°C for 16 hours. The reaction was concentrated and the residue purified  
 473 using silica gel column chromatography (90/10, Petroleum Ether/CH<sub>2</sub>Cl<sub>2</sub>, v/v), affording **7** as a dark  
 474 green solid (5.8 mg, 65%). *R<sub>f</sub>* (75/25, Petroleum Ether/CH<sub>2</sub>Cl<sub>2</sub>, v/v) = 0.73; IR (film)  $\tilde{\nu}$  = 3046, 2940,  
 475 2862, 2133, 1590, 1459, 1368 cm<sup>-1</sup>; <sup>1</sup>H NMR (600 MHz, CDCl<sub>3</sub>) δ 9.38 (s, 1H, H-5), 9.35 (s, 1H, H-14),  
 476 9.32 (s, 2H, H-7, H-12), 8.33 (d, *J*<sub>4',5'</sub> = 8.1 Hz, 1H, H-4'), 8.28 (d, *J*<sub>7',8'/J</sub><sub>11',12'</sub> = 7.4 Hz, 1H, H-7'/H-12'), 8.27  
 477 (d, *J*<sub>7',8'/J</sub><sub>11',12'</sub> = 7.4 Hz, 1H, H-7'/H-12'), 8.25 (d, *J*<sub>5',6'</sub> = 7.4 Hz, 1H, H-6'), 8.09 (m, 2H, H-1, H-4), 7.99 (m,  
 478 2H, H-8, H-11), 7.88 (d, *J*<sub>1',2'</sub> = 7.7 Hz, 1H, H-1'), 7.72 (d, *J*<sub>8',9'</sub> = *J*<sub>10',11'</sub> = 8.2 Hz, 2H, H-9', H-10'), 7.65 (d,  
 479 *J*<sub>1',2'</sub> = 7.7 Hz, 1H, H-2'), 7.60 (dd, *J*<sub>3,4</sub> = 8.9 Hz, *J*<sub>1,3</sub> = 1.2 Hz, 1H, H-3), 7.53 (m, 2H, H-8', H-11'), 7.48 (dd,  
 480 *J*<sub>4',5'</sub> = 8.1 Hz, *J*<sub>5',6'</sub> = 7.4 Hz, 1H, H-5'), 7.43 (m, 2H, H-9, H-10), 1.39 (m, 21H, H-3'', H-4'' or H-3''', H-4'''),  
 481 1.34 (m, 21H, H-3'', H-4'' or H-3''', H-4'''); <sup>13</sup>C NMR (150 MHz, CDCl<sub>3</sub>, observed and assigned by HSQC  
 482 and HMBC) δ 139.7 (C-3'), 138.5 (C-2), 134.8 (C-9'a), 133.0 (C-3'a), 132.35 (C-14a), 132.33 (C-7a, C-

483 11a), 131.6 (C-6'a), 131.5 (C-4a), 131.4 (C-6'b/C-12'a), 131.2 (C-6'b, C-12'a), 131.1 (C-12'b), 130.92 (C-  
484 13a), 130.85 (C-5a), 130.8 (C-6a/C-12a), 130.7 (C-6a/C-12a), 129.19 (C-3'a<sup>1</sup>), 129.17 (C-3), 128.8 (C-1),  
485 128.73 (C-8, C-11), 128.69 (C-6'b<sup>1</sup>), 128.6 (C-4), 128.00 (C-2'), 127.98 (C-9', C-10'), 126.8 (C-5'), 126.5  
486 (C-14), 126.39 (C-7, C-12), 126.36 (C-1'), 126.3 (C-5), 126.1 (C-9, C-10), 120.6 (C-7'/C-12'), 120.5 (C-6'),  
487 120.4 (C-7', C-12'), 120.1 (C-4'), 118.5 (C-6), 118.4 (C-13), 104.7 (C-1''). Note: C-2'' was not observed;  
488 UV-Vis (CH<sub>2</sub>Cl<sub>2</sub>)  $\lambda$ , nm ( $\epsilon$ , M<sup>-1</sup>cm<sup>-1</sup>) = 420 (21162), 444 (32557), 553 (2442), 598 (8139), 650 (15058);  
489 Fluorescence (C<sub>6</sub>H<sub>5</sub>CH<sub>3</sub>,  $\lambda_{\text{ex}}$  = 420 nm)  $\lambda_{\text{max}}$  = 660 nm; HRMS (ESI)  $m/z$  calcd. for [C<sub>64</sub>H<sub>65</sub>Si<sub>2</sub>]<sup>+</sup>: 889.4619,  
490 obsd.: 889.4619.

491 **1.6**  **$^1\text{H}$  and  $^{13}\text{C}$  NMR spectra of dyads 4 – 7.**

492 Note: 2D HSQC and HMBC were used to confirm the location of the carbon peaks due to the size of these molecules reducing measurement sensitivity.

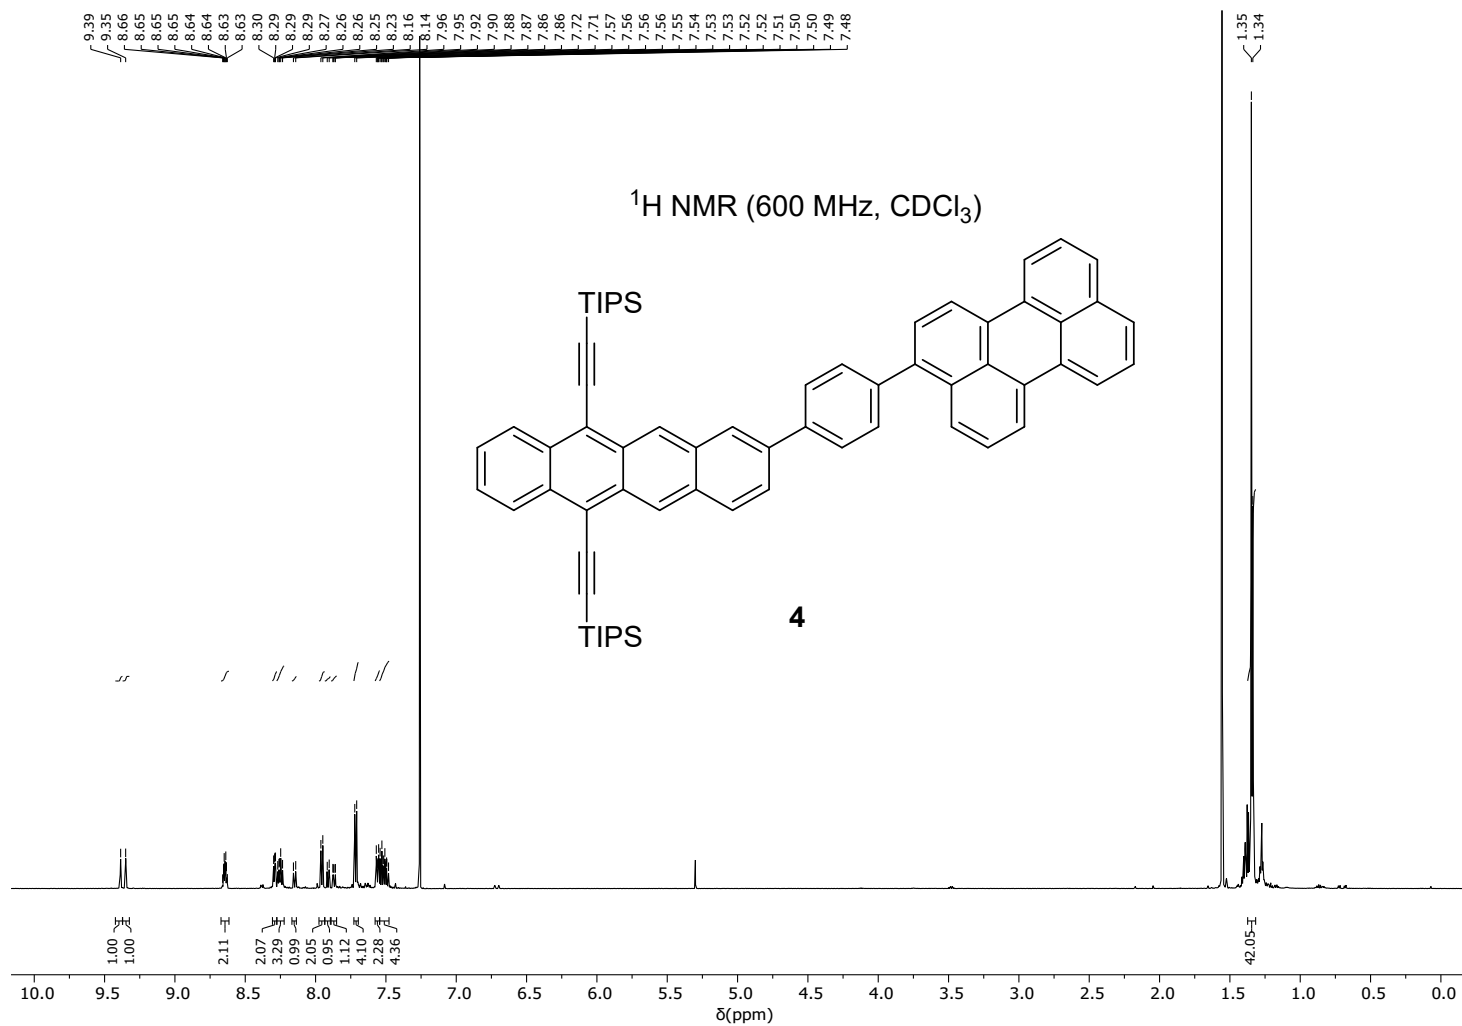

493

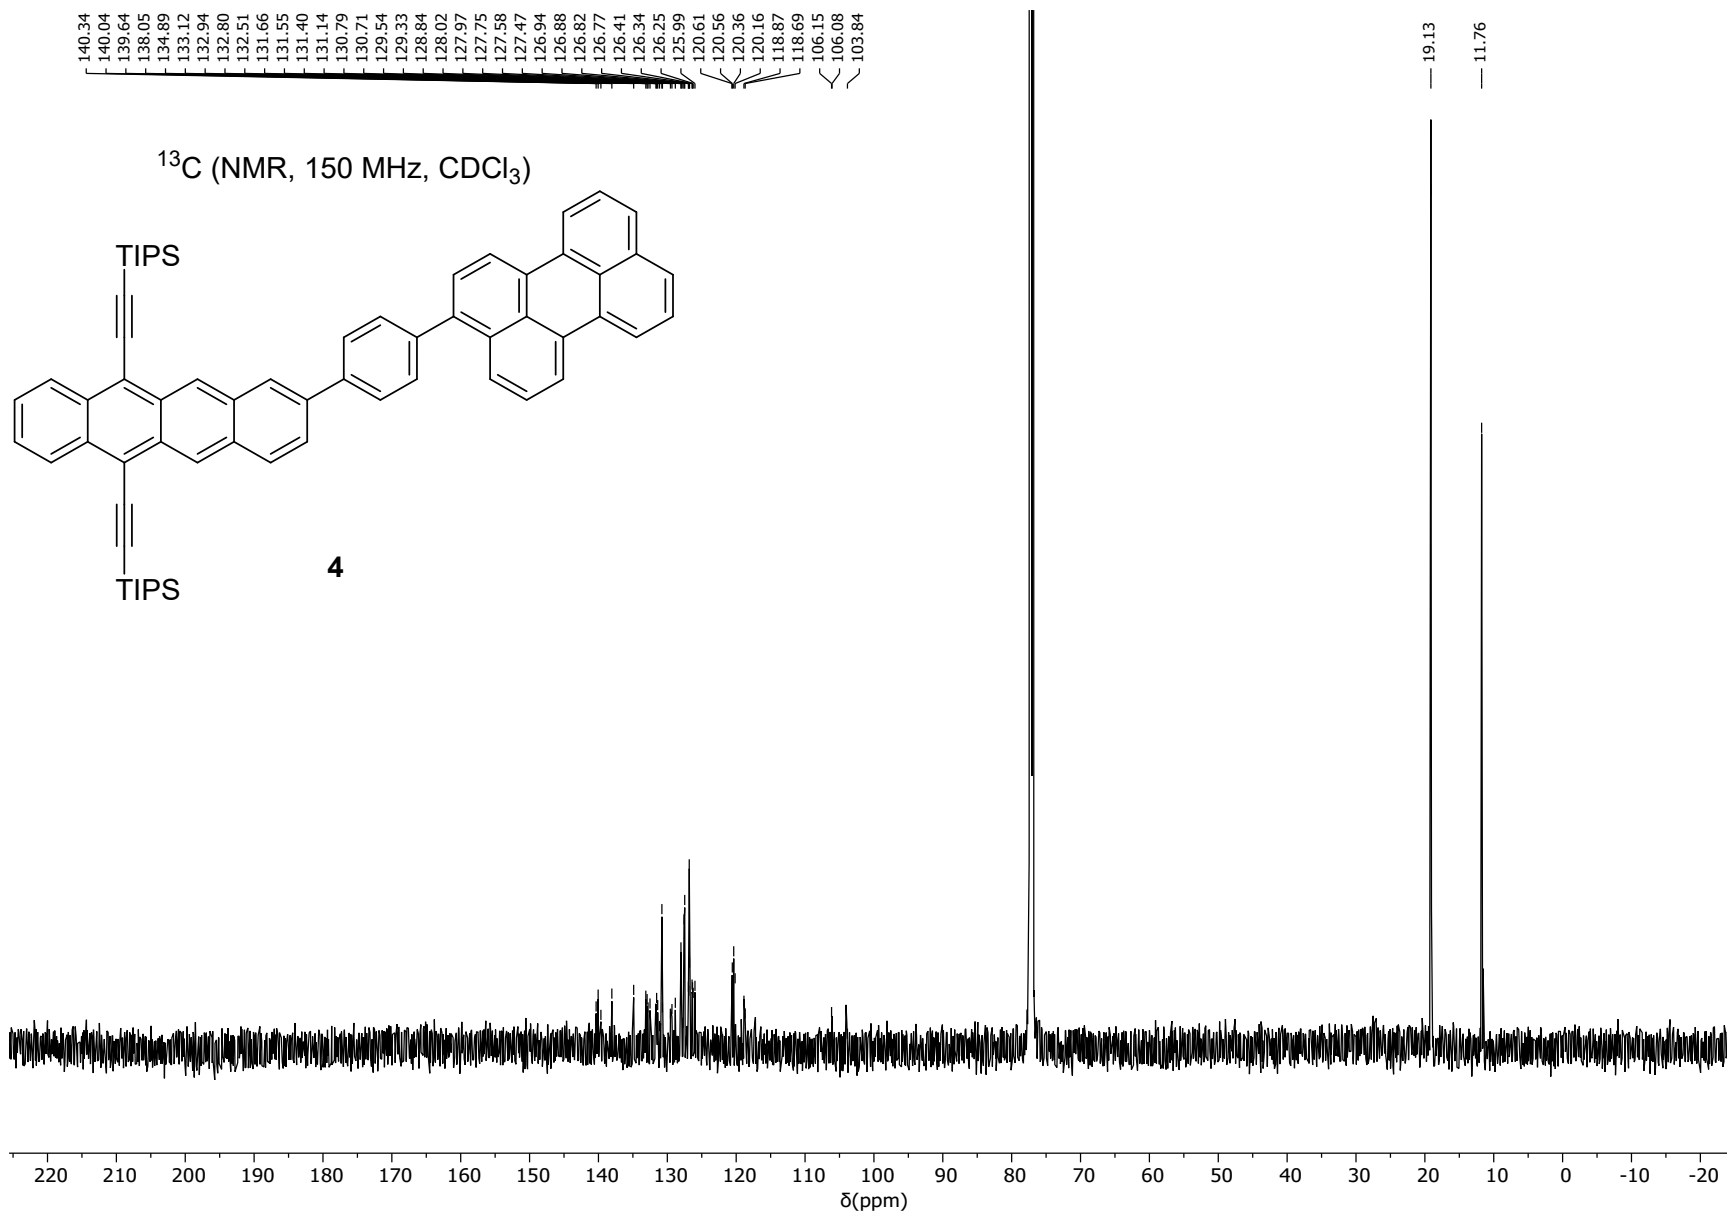

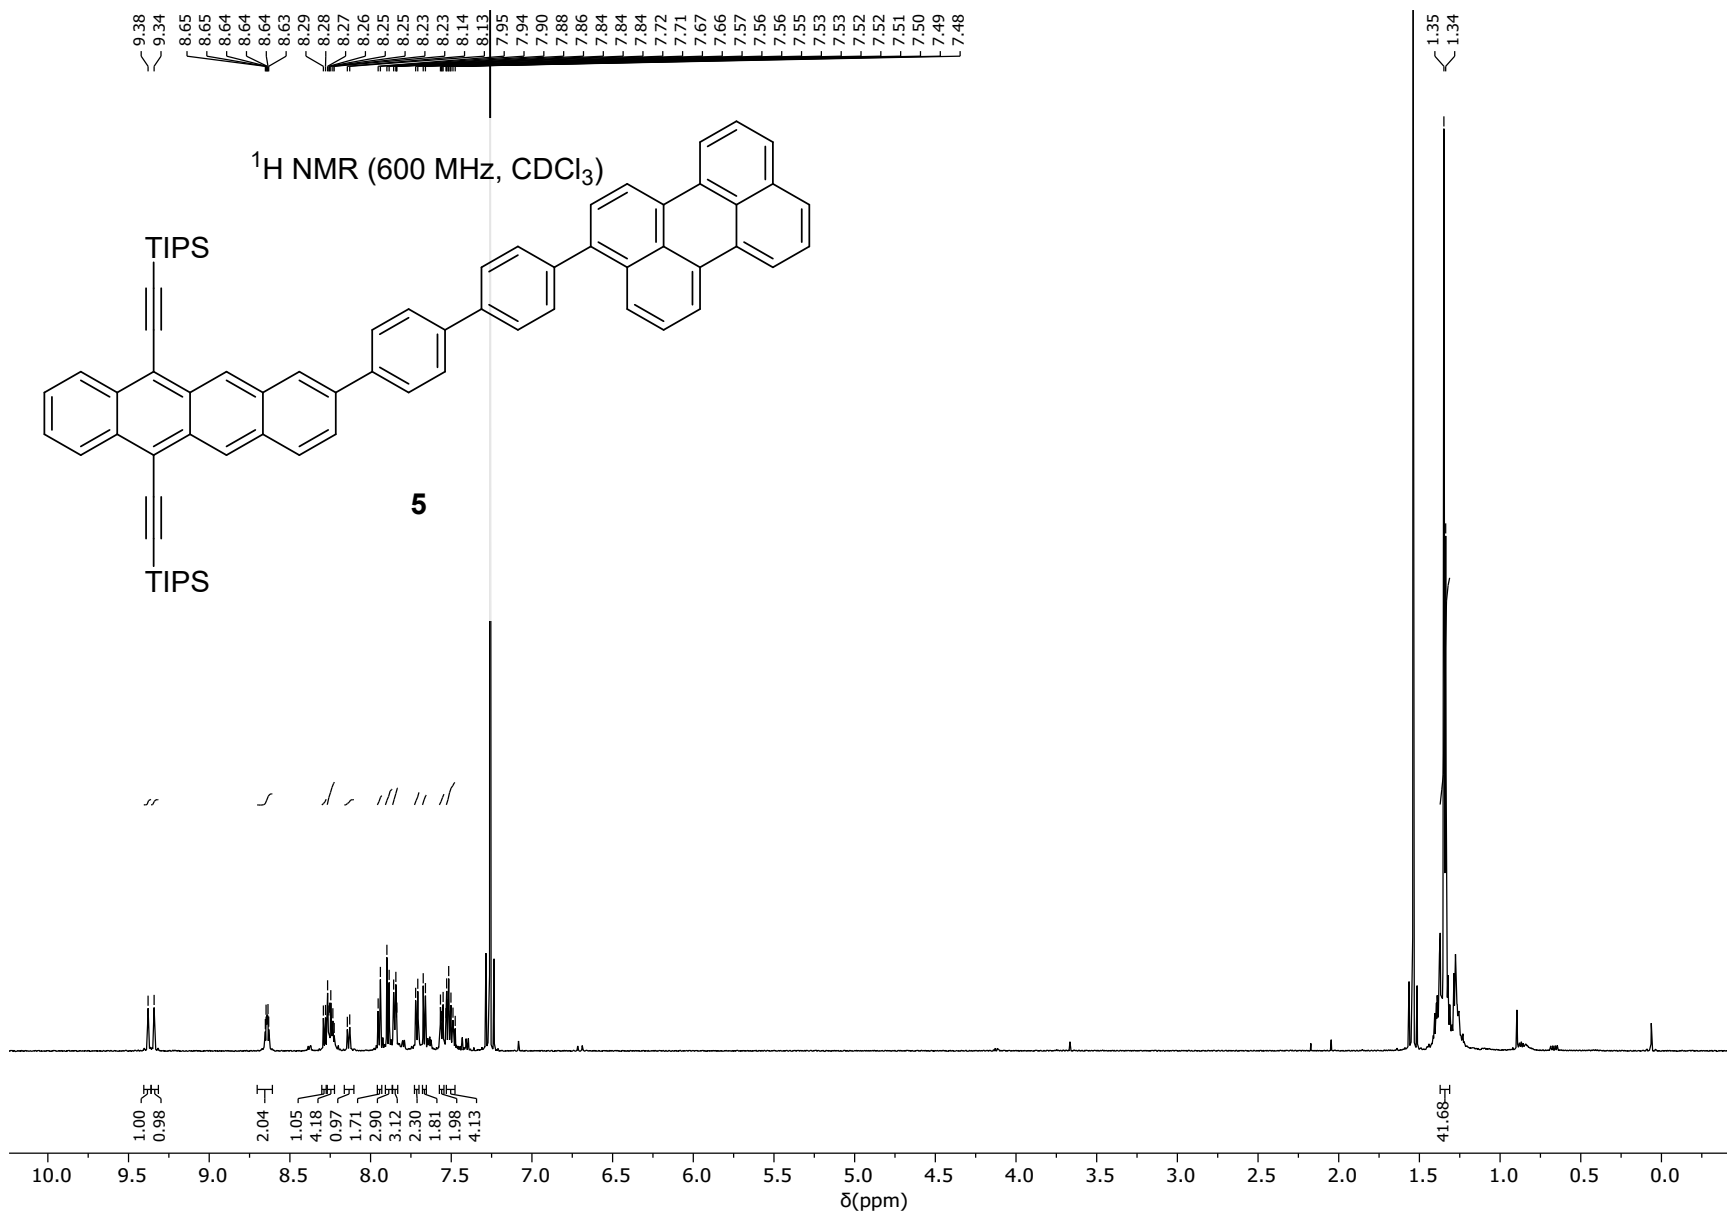

140.19  
140.14  
140.06  
139.82  
139.68  
137.94  
134.88  
133.12  
132.92  
132.80  
132.50  
131.76  
131.74  
131.65  
131.58  
131.41  
130.87  
130.68  
130.65  
129.50  
129.31  
128.84  
127.95  
127.83  
127.78  
127.76  
127.57  
127.19  
126.93  
126.81  
126.78  
126.32  
125.92  
120.60  
120.55  
120.34  
120.15  
118.86  
118.69  
106.14  
106.06  
104.09  
104.05

<sup>13</sup>C NMR (150 MHz, CDCl<sub>3</sub>)

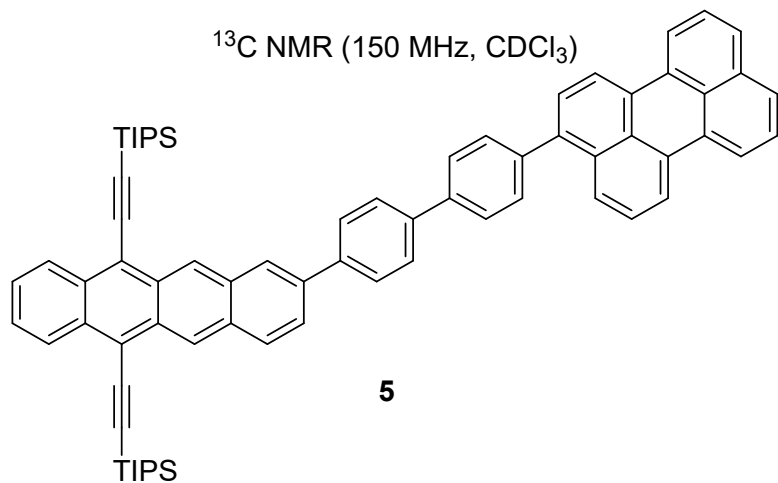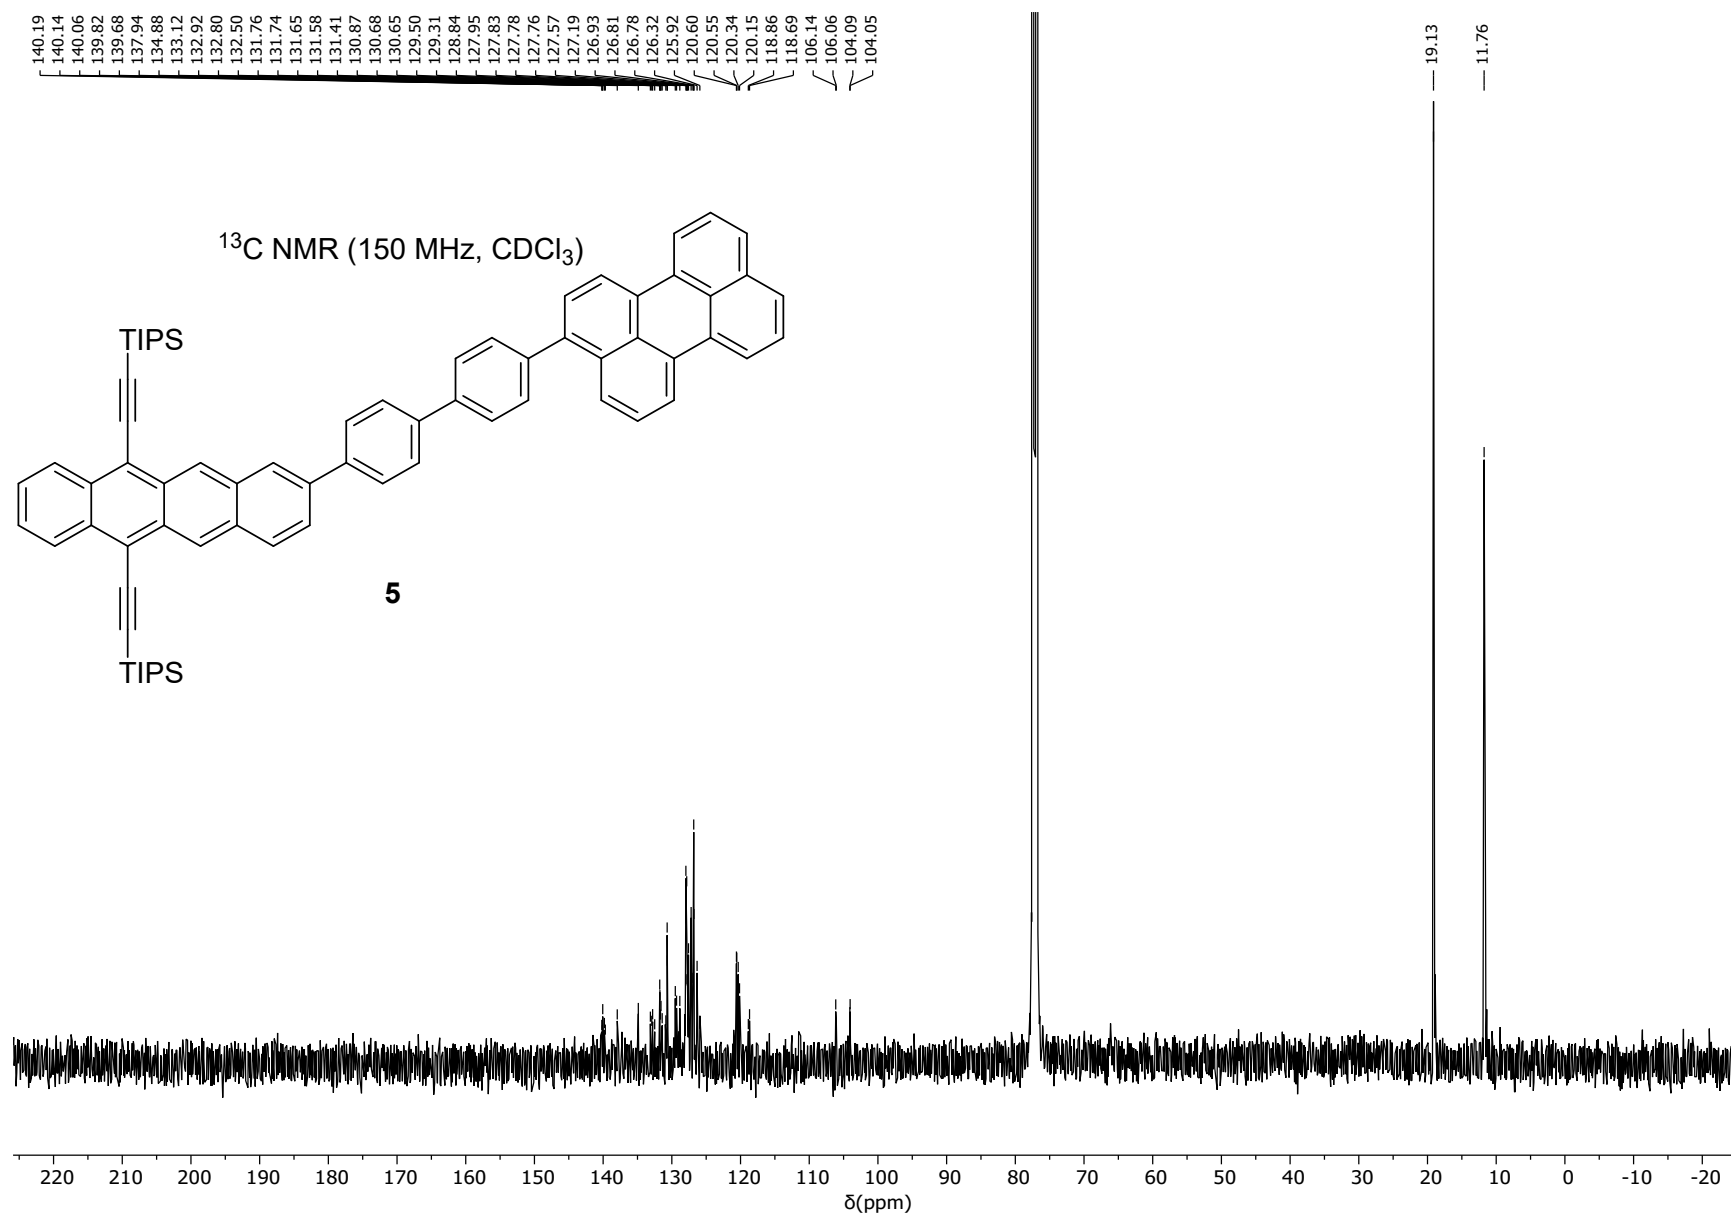



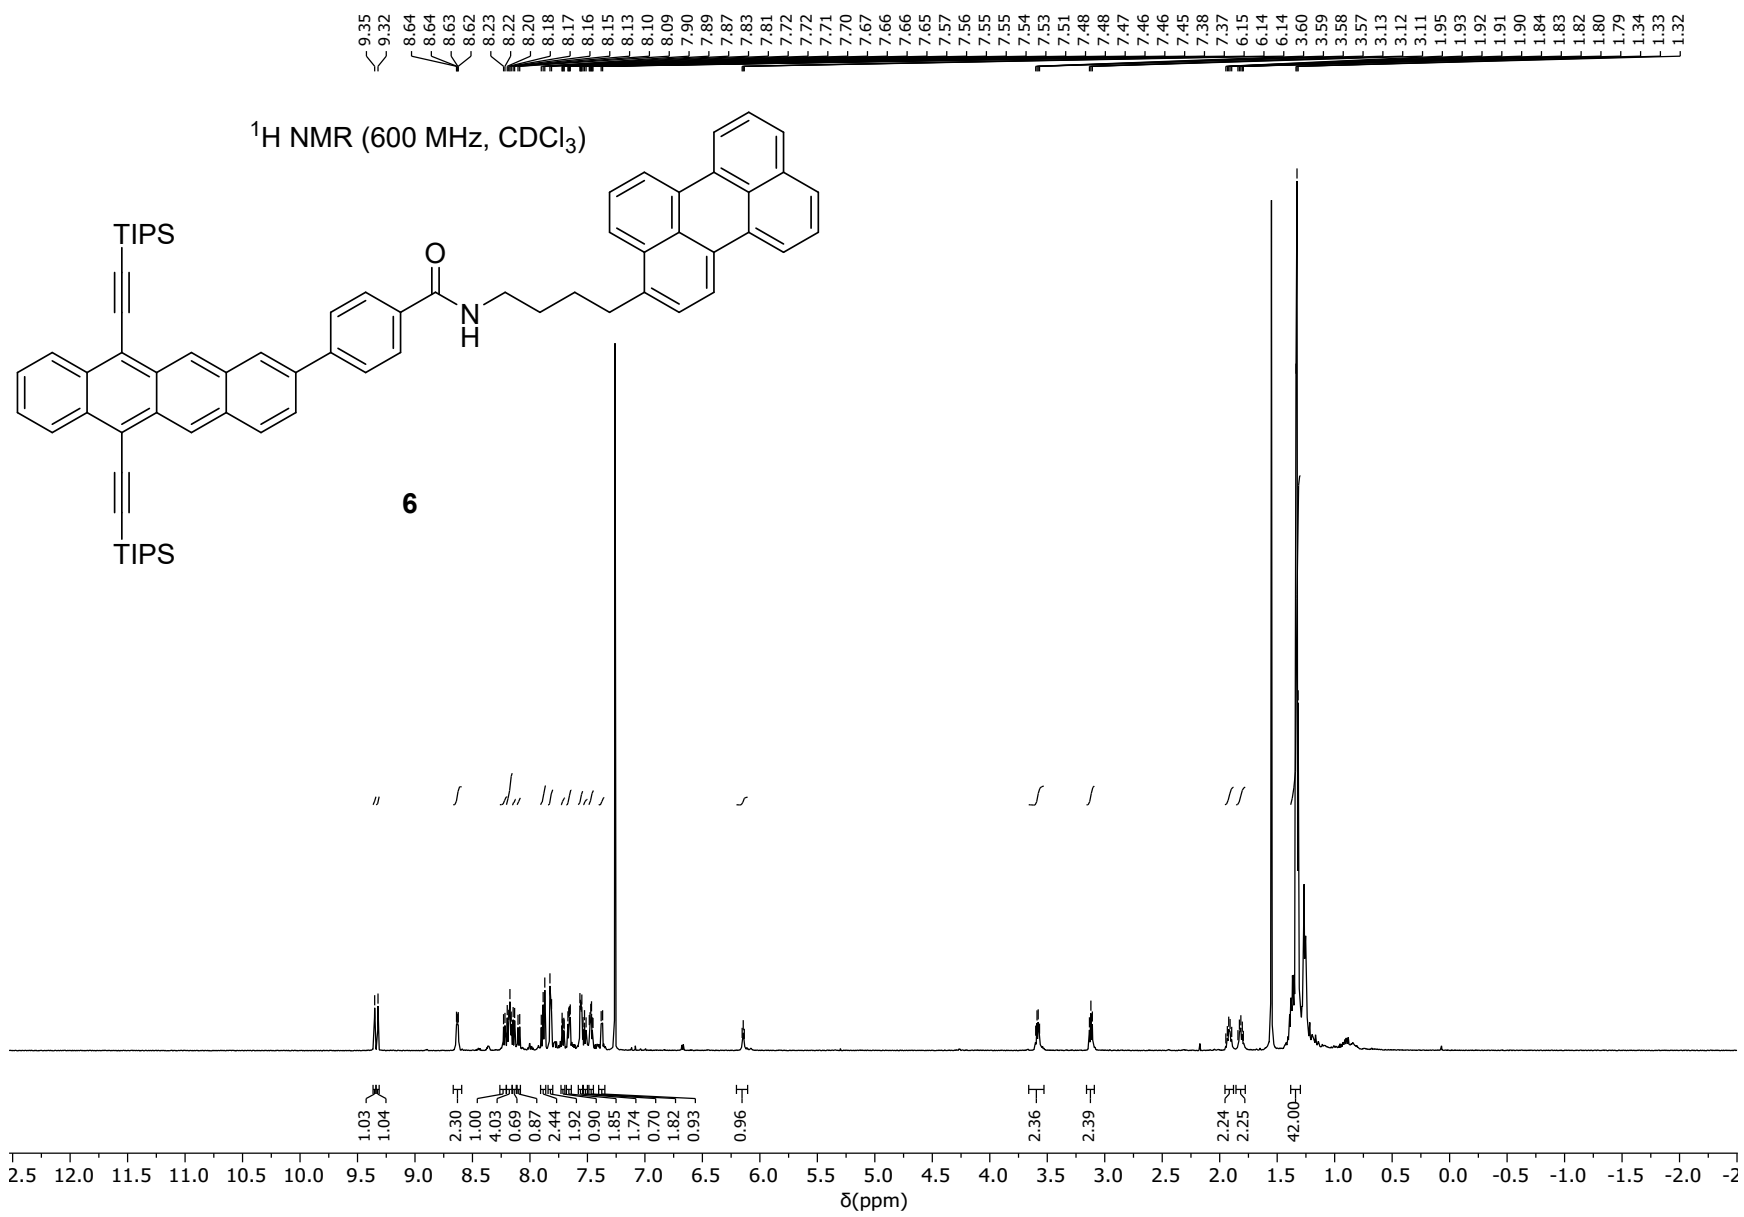

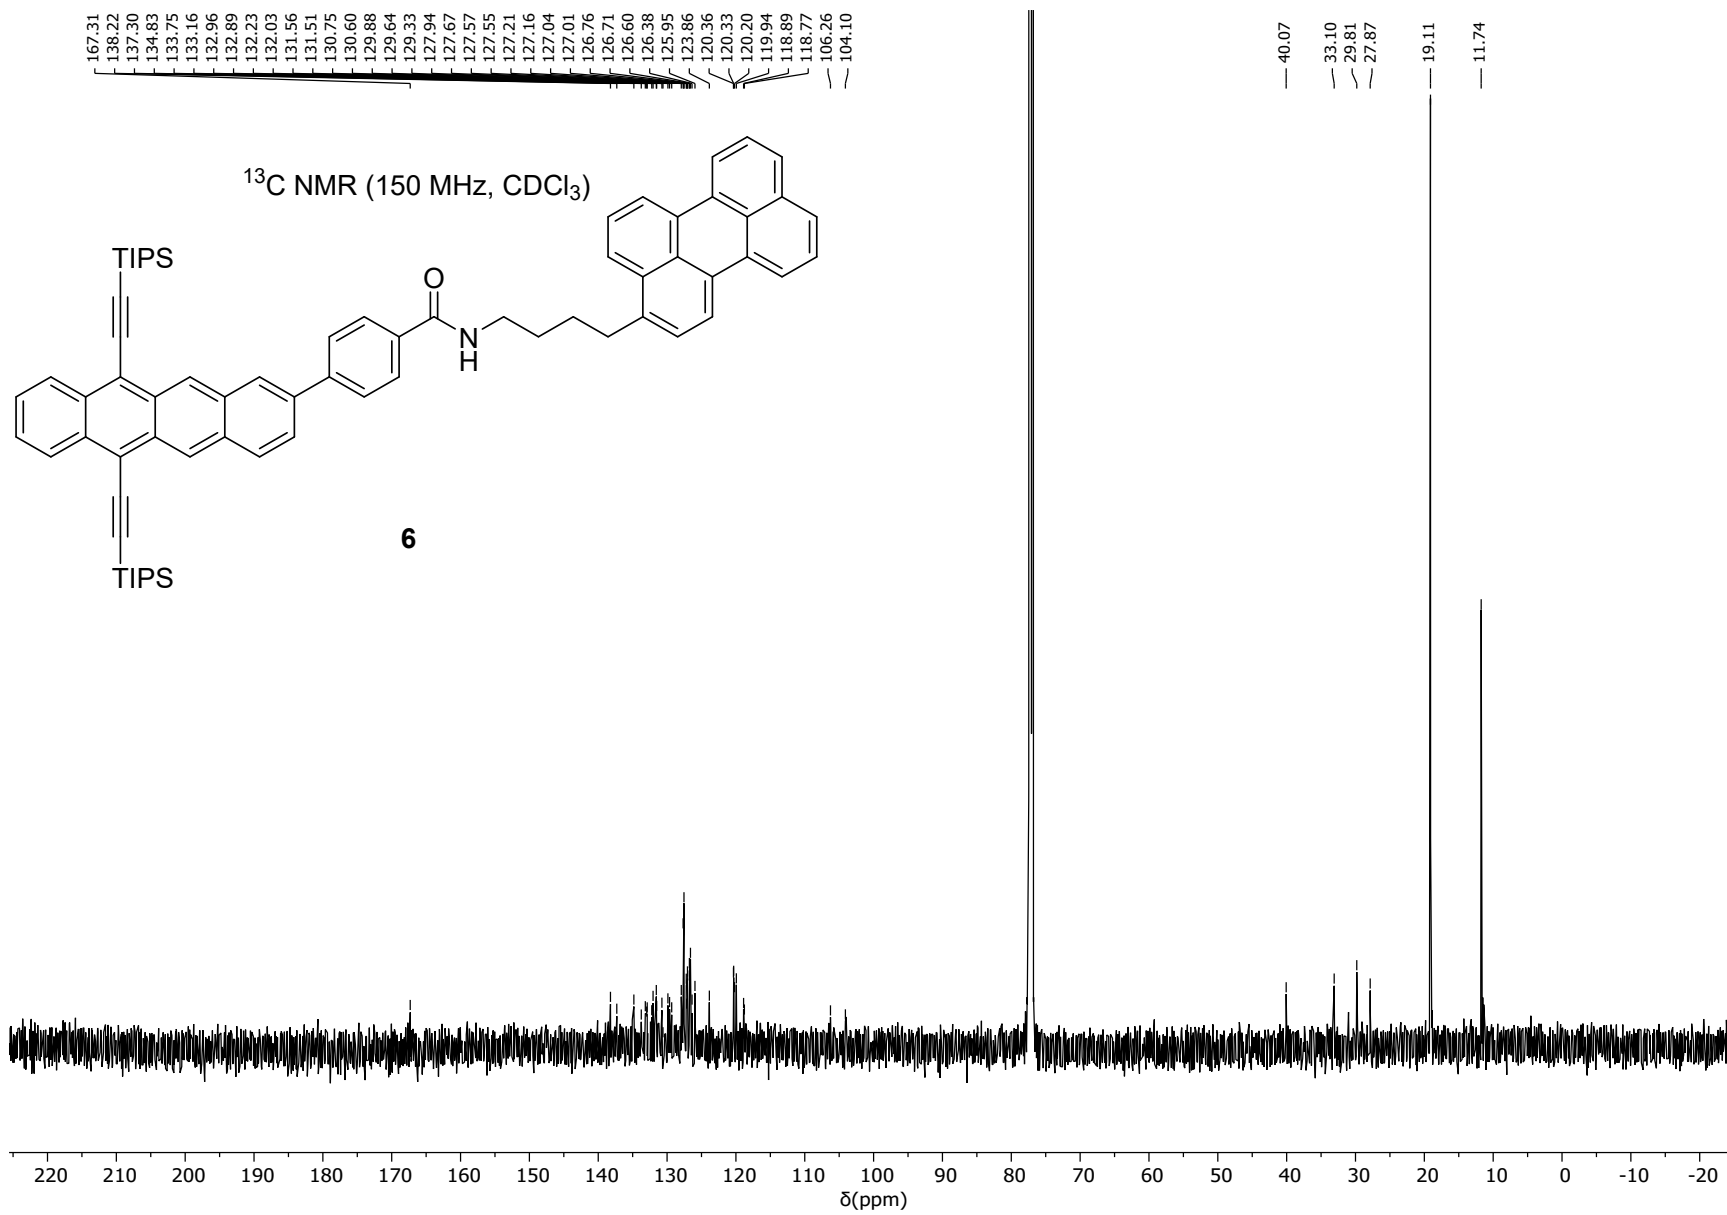

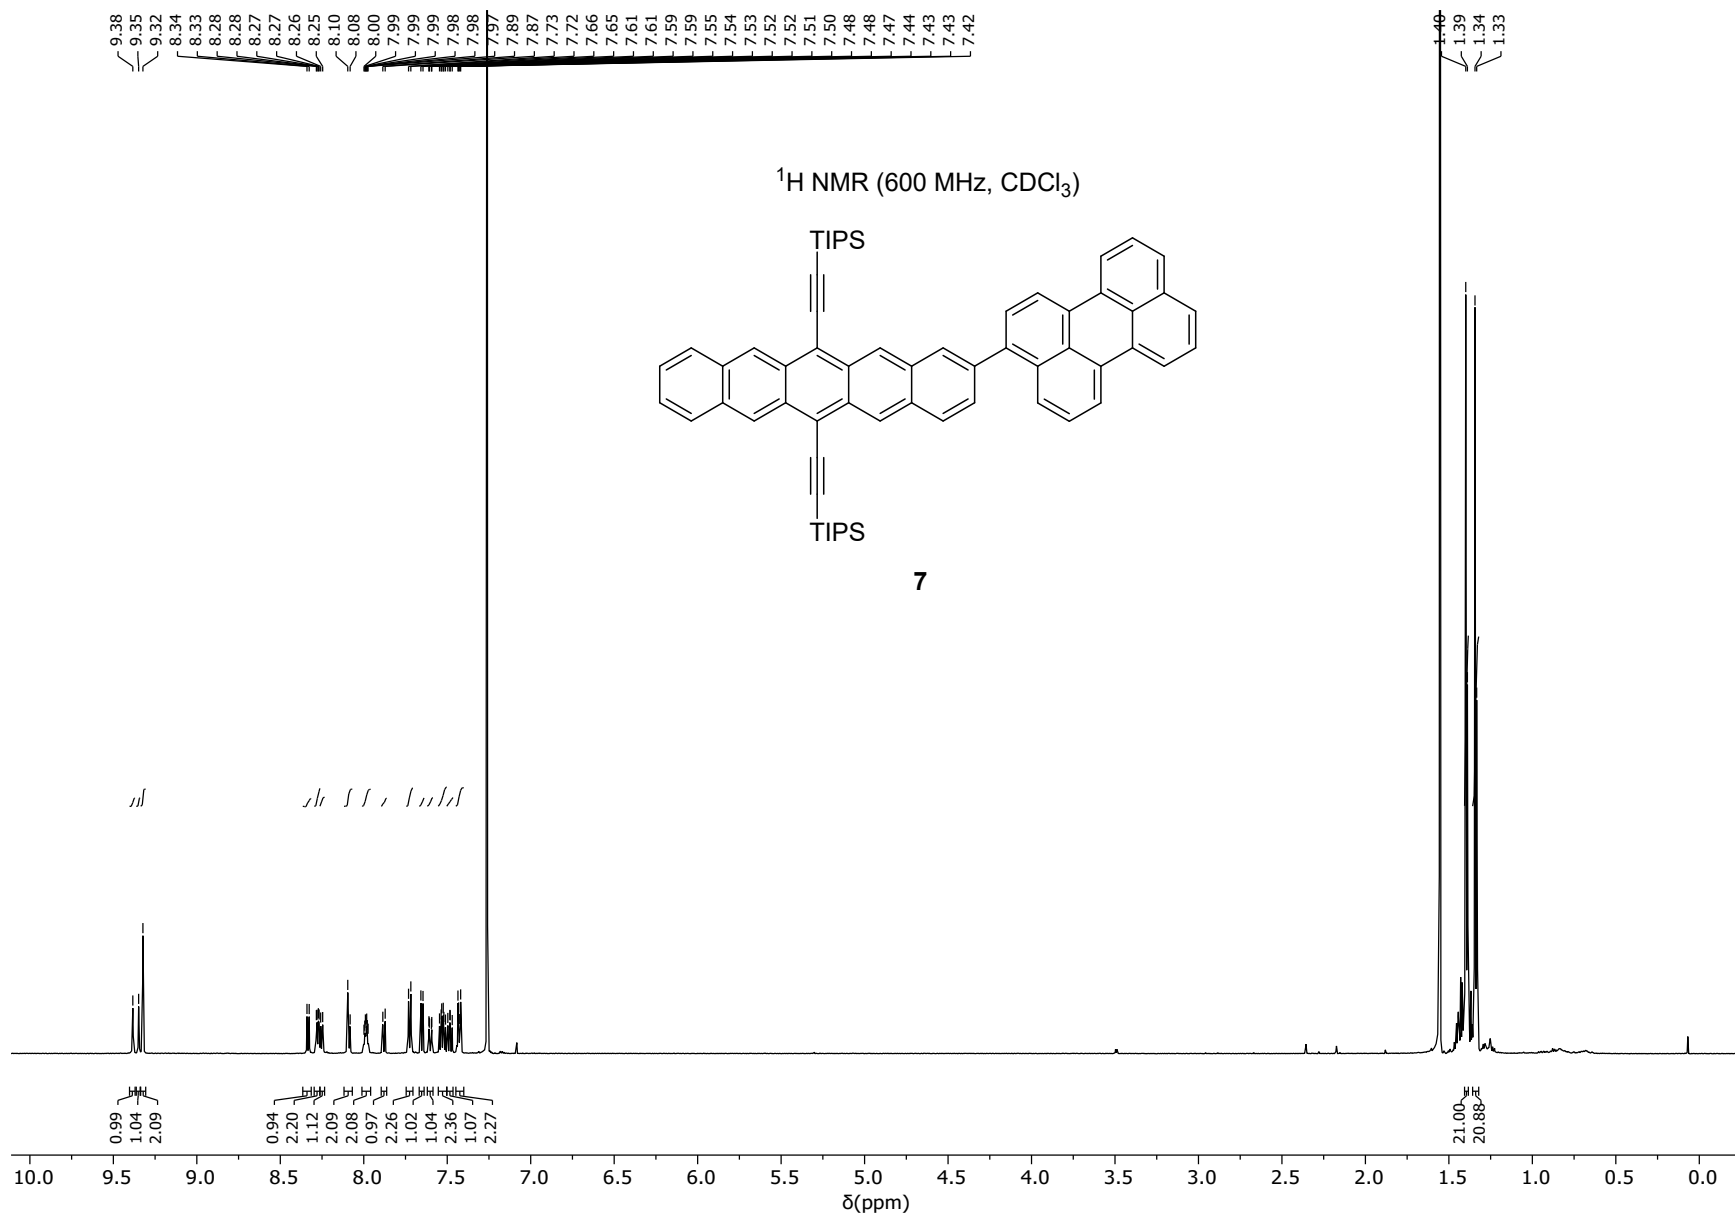

$^{13}\text{C}$  NMR (150 MHz,  $\text{CDCl}_3$ )

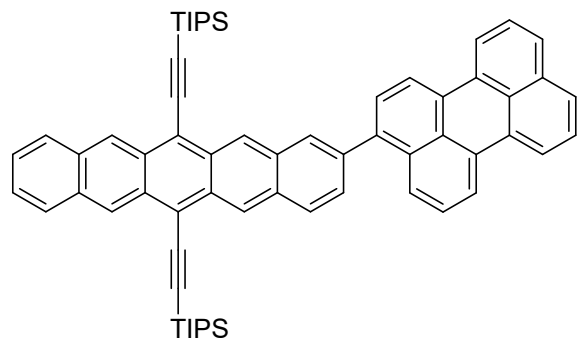

7

— 19.14  
— 11.79

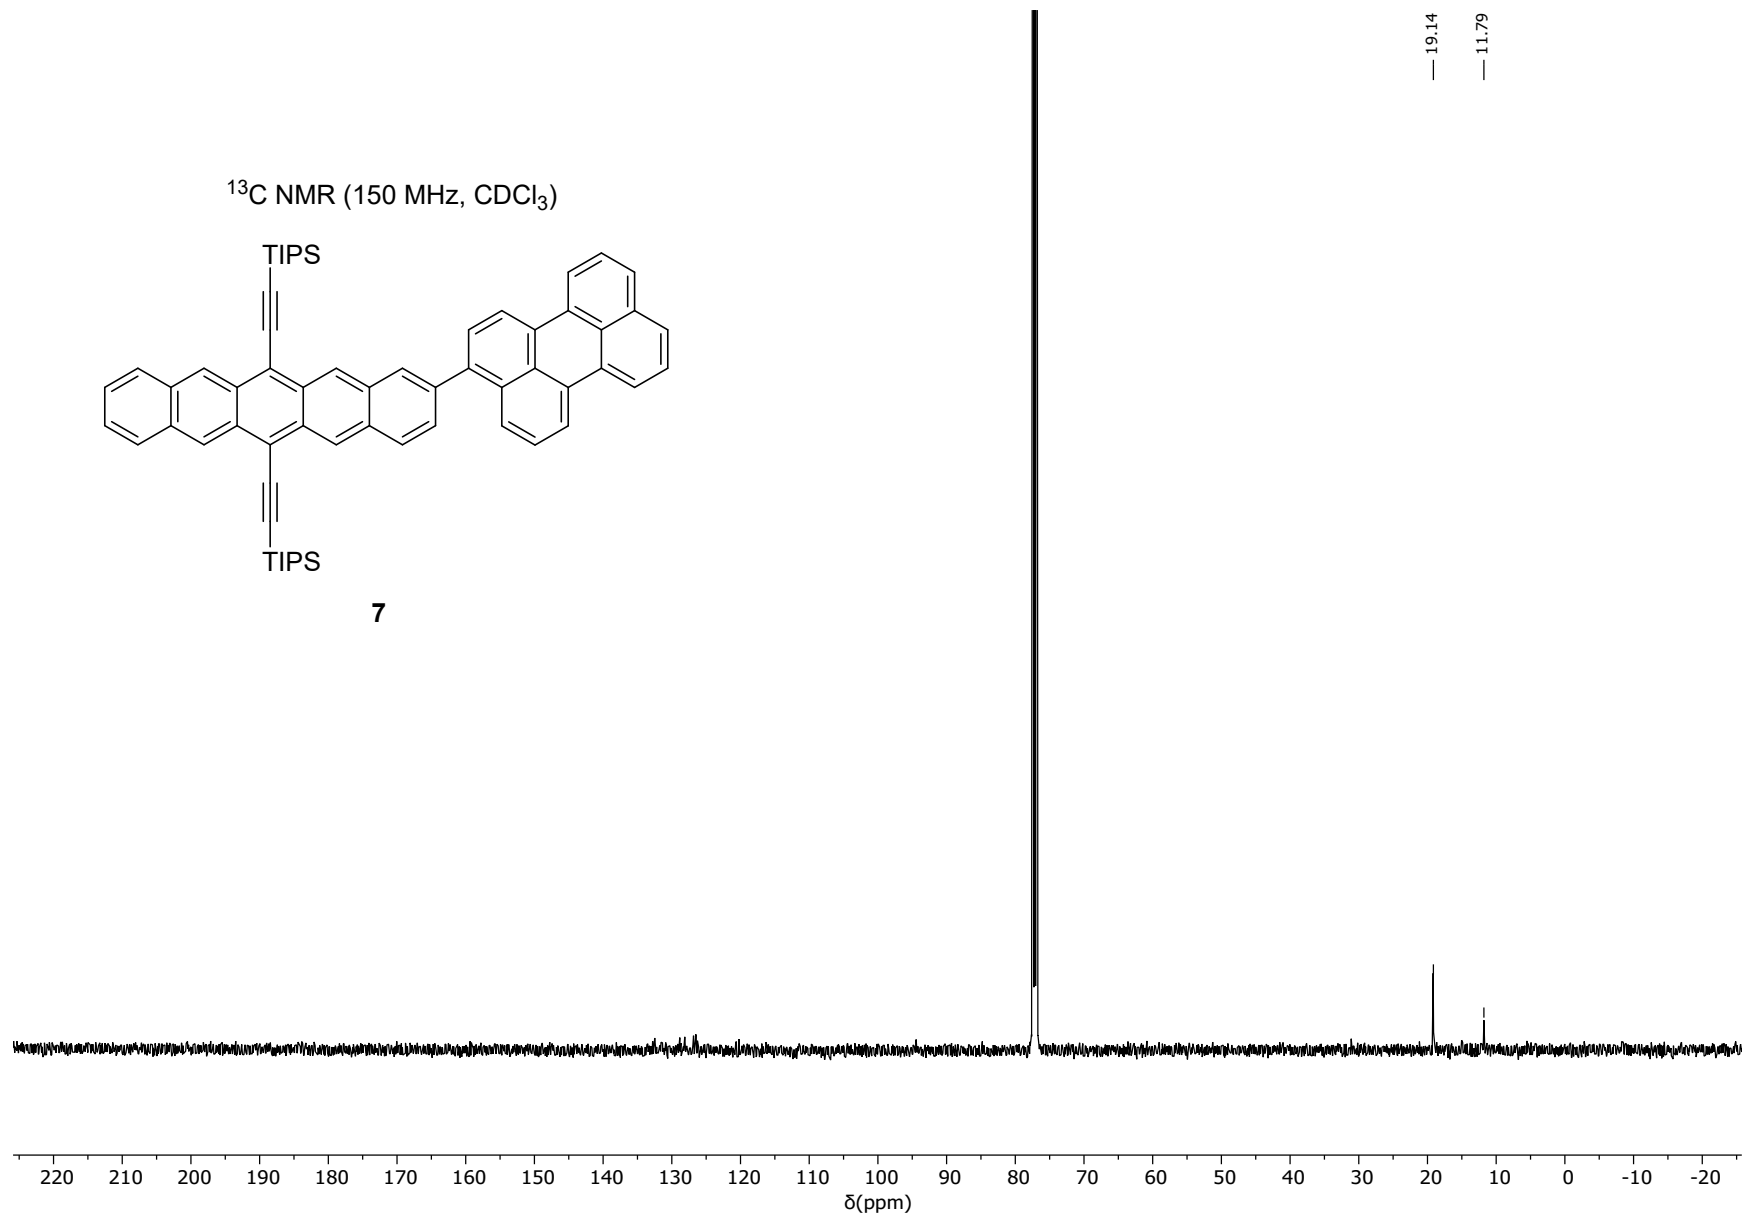

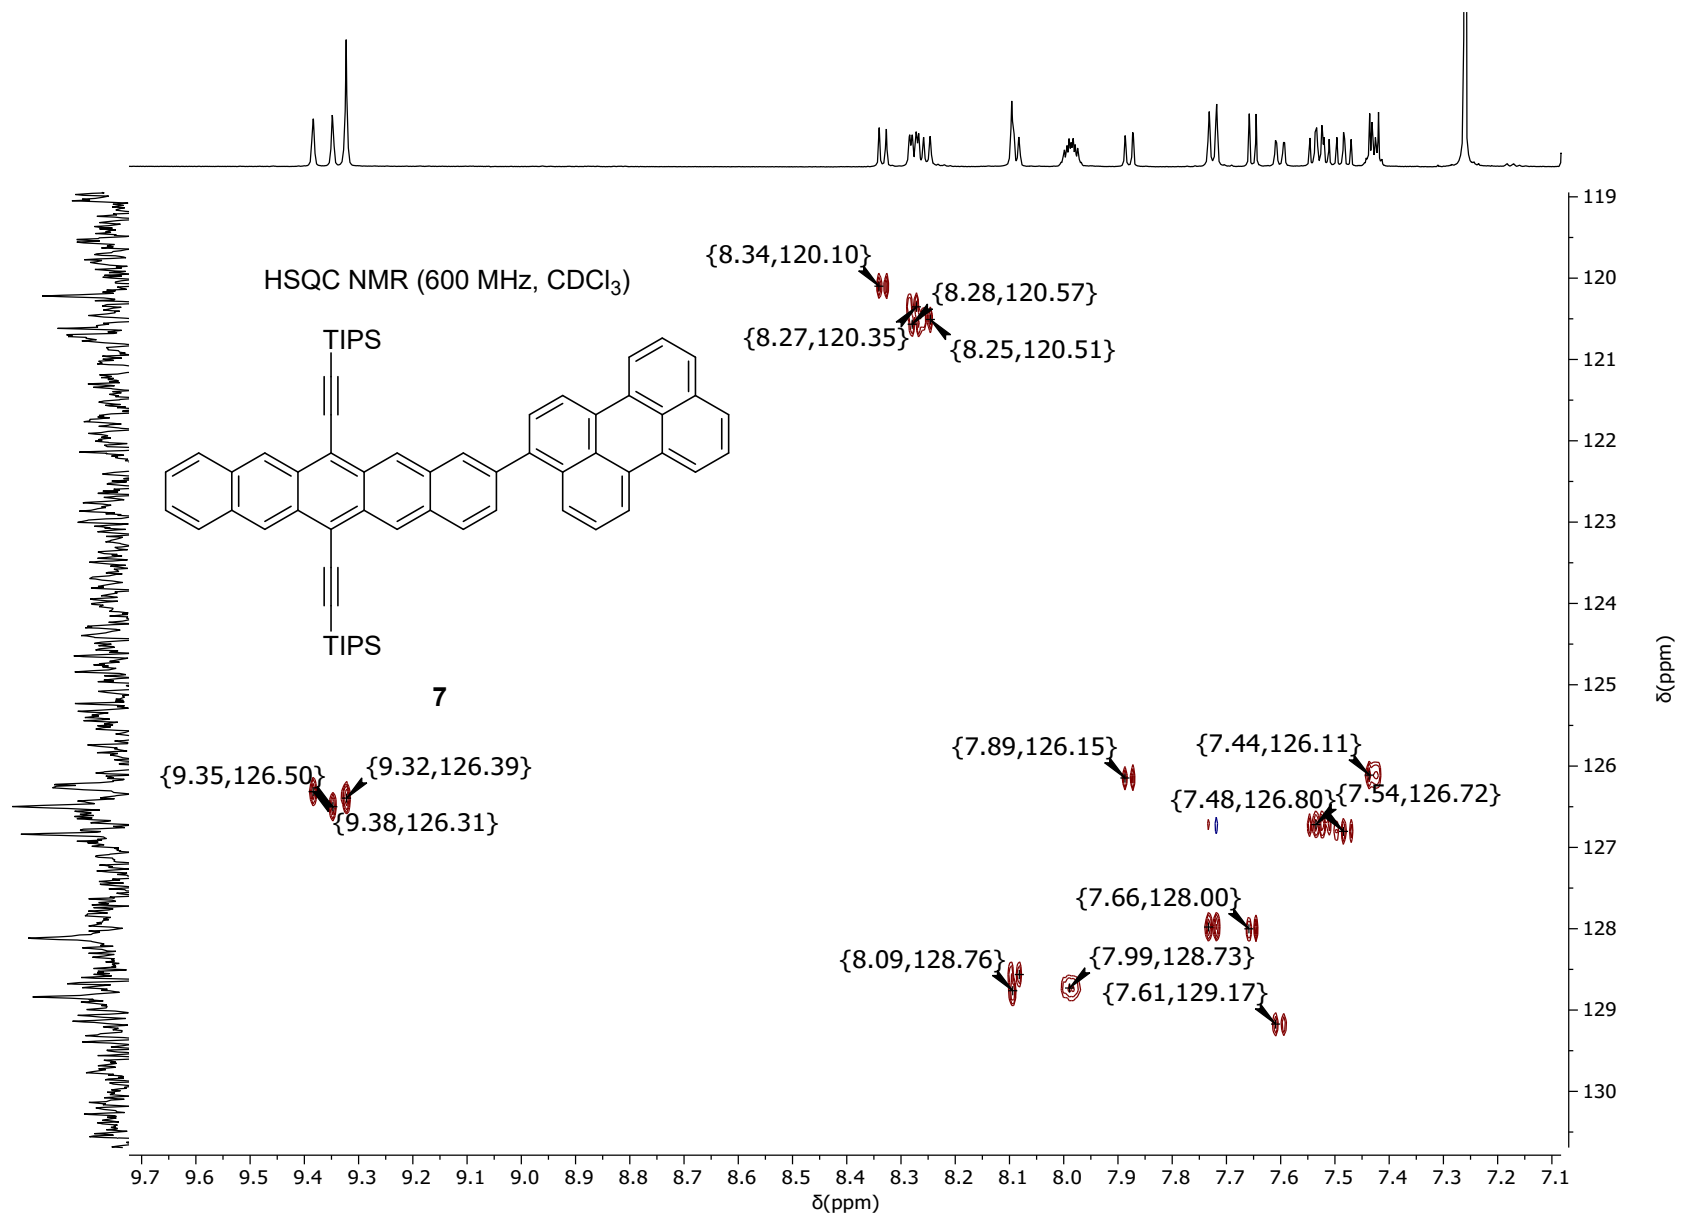

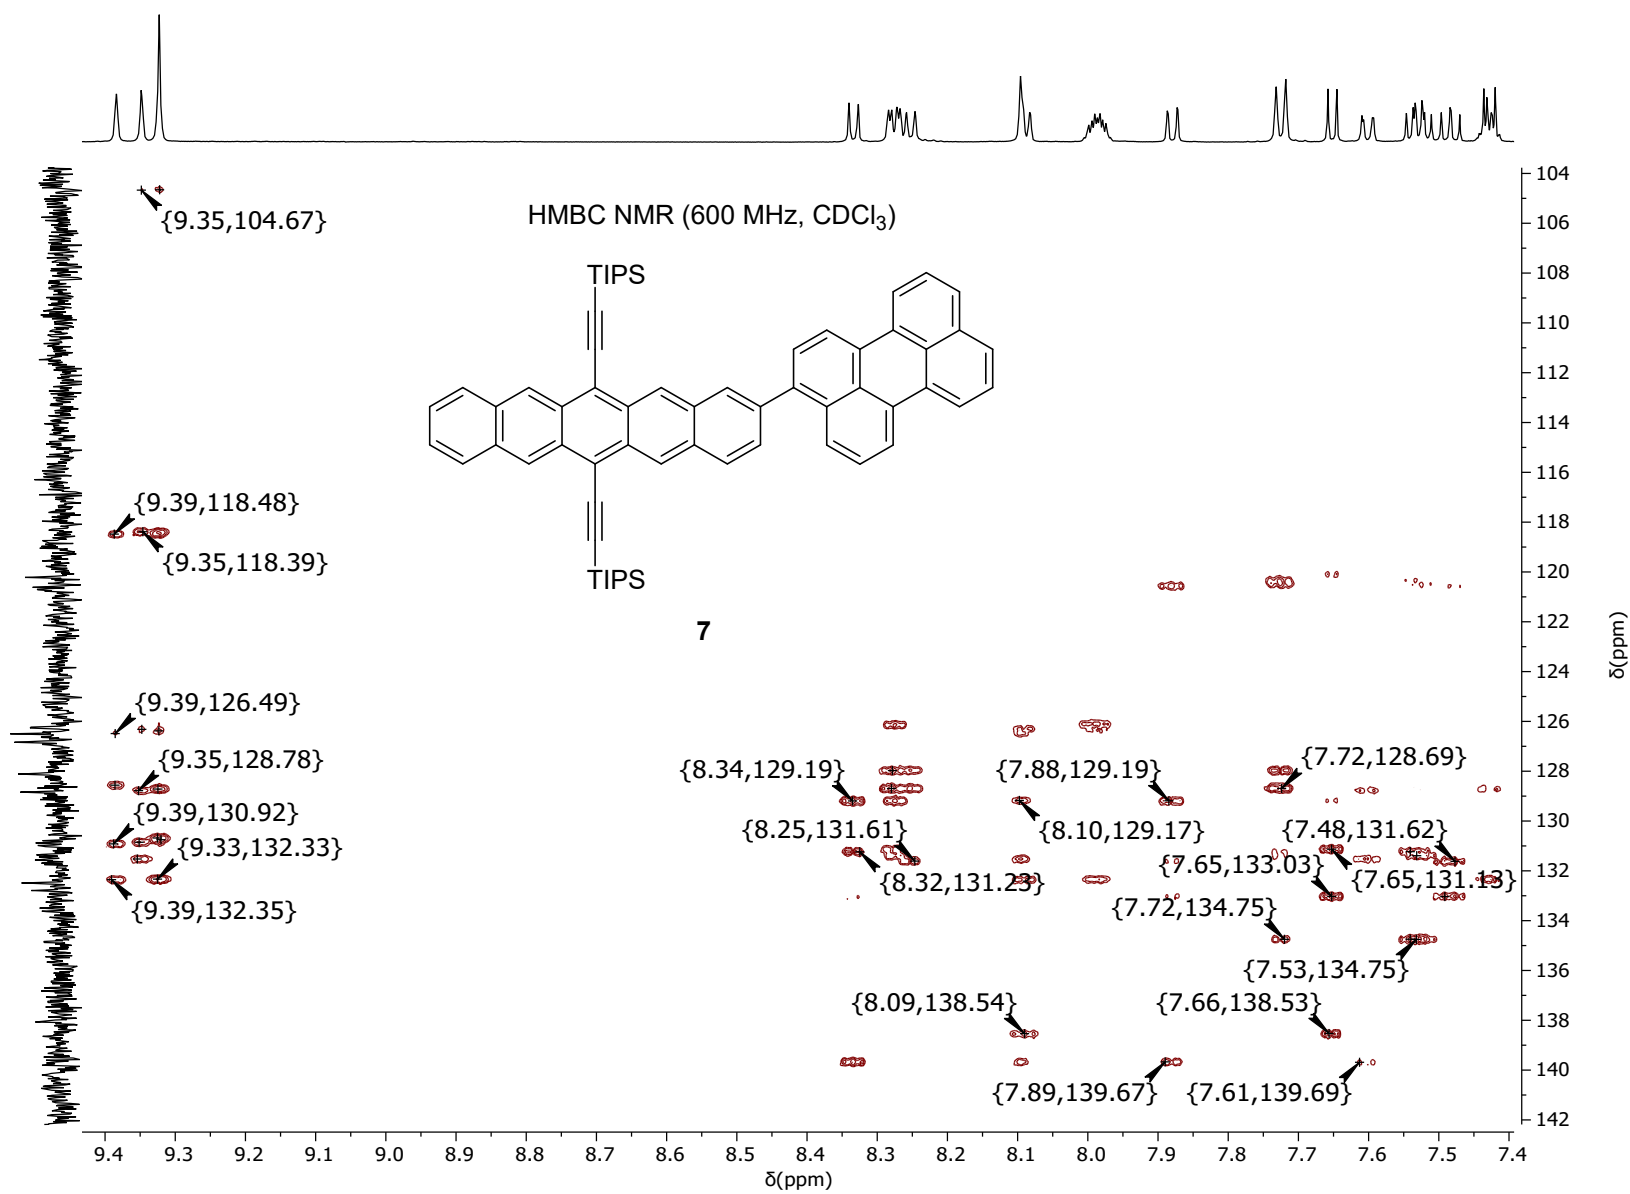

## 503 2 Additional Figures and Analysis

### 504 2.1 Structures of numbered molecules not presented in the main text.

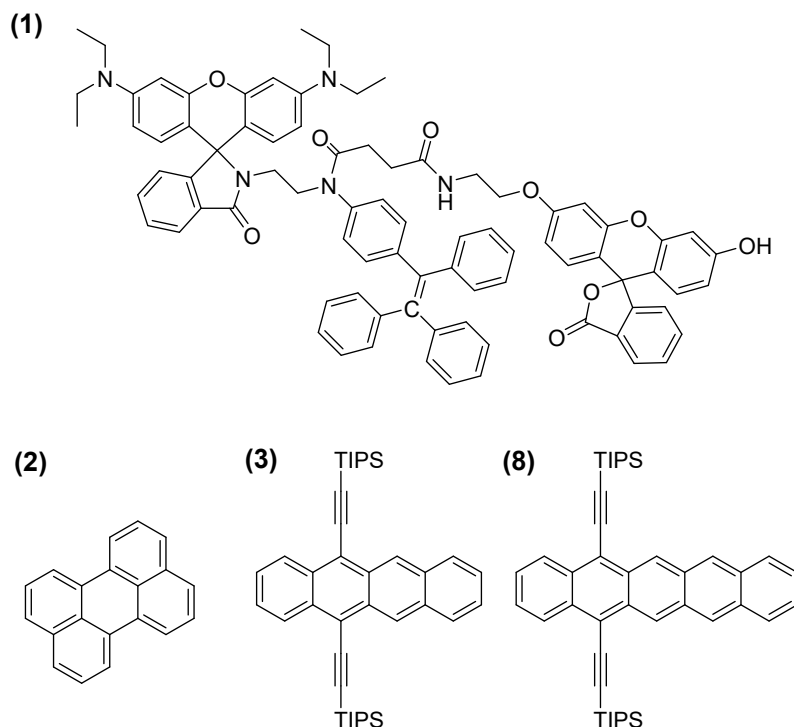

505

506 Figure S1: Structures of numbered molecules not presented in the main text including: (1) A conjugate  
507 molecule containing derivatives of red-emitting rhodamine, green-emitting fluorescein and blue-  
508 emitting tetraphenylethylene as presented in J. Mater. Chem. C, 2019, 7, 14555-14562. (2) Perylene.  
509 (3) TIPS-tetracene. (4) TIPS perylene

510

### 511 2.2 Solvent Dependent PLQE of PerTet-1

512 Table S1. Solvent dependent PLQEs of PerTet-1, ranging from 12 – 45%. Error is less than  
513  $\pm 2\%$  due to detection sensitivity and laser stability.

| Solvent    | PLQE (%) |
|------------|----------|
| Hexane     | 39       |
| Toluene    | 45       |
| Chloroform | 27       |
| o-DCB      | 32       |
| ACN        | 15       |
| EtOH       | 20       |

|      |    |
|------|----|
| DMF  | 14 |
| DMSO | 12 |

514

515 **2.3 Lippert-Mataga**

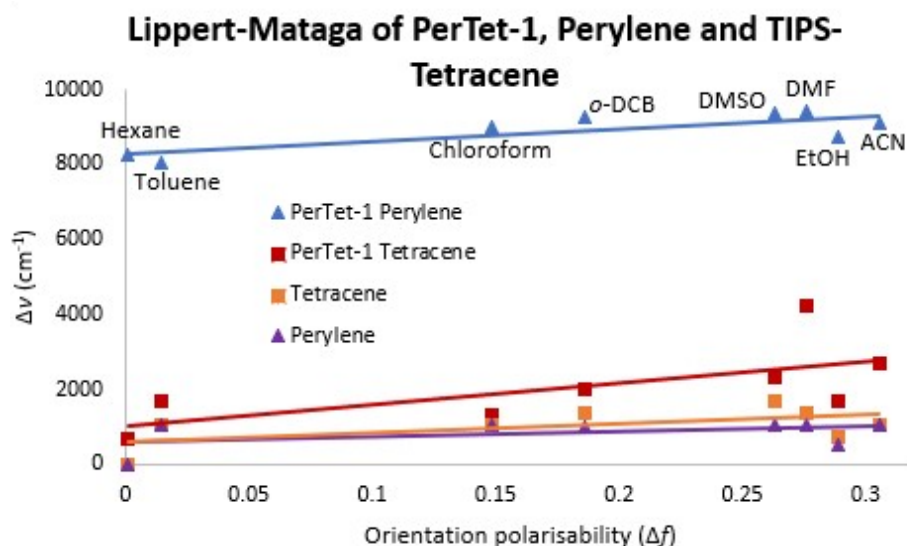

516

517 Figure S2. Lippert-Mataga plot for the perylene and tetracene Stokes shifts of PerTet-1, compared  
518 with perylene and TIPS-tetracene alone.

519 **2.4 Computational Energy Levels**

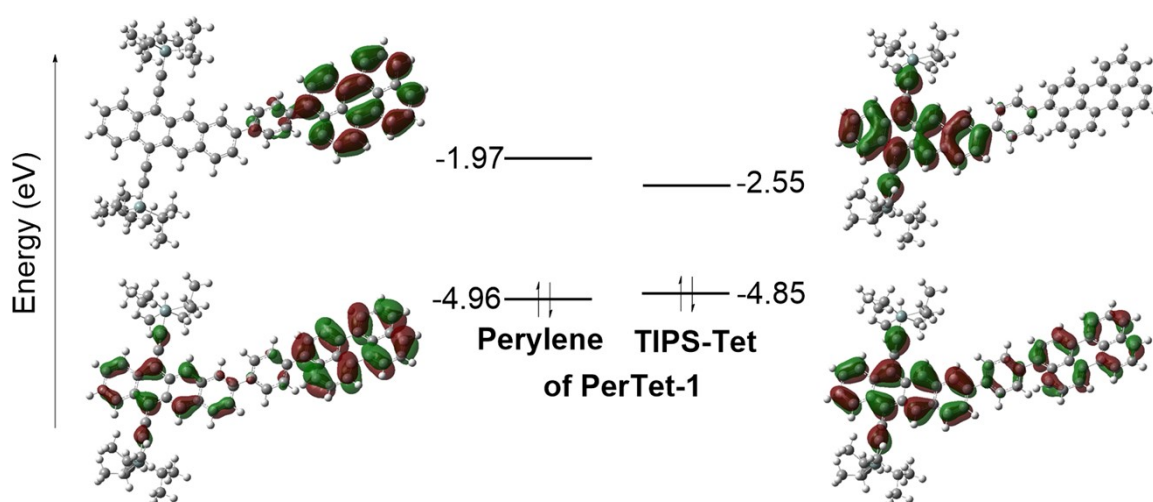

520

521 Figure S3. Computational analysis of PerTet-1, demonstrating the relative vacuum energies of the  
522 HOMO and LUMO of the tetracene and perylene portions of the molecule. The molecular orbitals of  
523 these levels have also been shown.



## 524 2.5 Rehm-Weller Calculation

525 Experimental values for the HOMO of perylene (-5.38eV)<sup>9</sup> and LUMO of TIPS-tetracene (-3.8eV,  
526 determined by adding the optical gap<sup>10</sup> and exciton binding energy to the reported HOMO<sup>11</sup>) and the  
527 singlet energy gap of perylene (2.82eV)<sup>12</sup> were used in the Rehm-Weller equation<sup>13</sup>:

$$528 \Delta G_{et} = E(D^+ / D) - E(A/A^-) - \Delta E_{00} + w_p$$

$$529 \Delta G_{et} = (5.38eV - 3.8eV) - 2.82eV = -1.24eV$$

530 Here,  $w_p$  is the work required to bring the donor and acceptor within electron transfer distance. Since  
531 these molecules are attached, we can assume this value will be 0. Similarly, the charge transfer  
532 coulomb energy will be close to zero or negative.

## 533 2.6 Estimated Energy Transfer Efficiency

$$534 E_{eff} = \frac{1}{1 + \frac{1}{k_{ET}\tau_D}}$$

535 Where  $E_{eff}$  is the energy transfer efficiency,  $k_{ET}$  is the rate of energy transfer and  $\tau_D$  is the lifetime of  
536 the donor component (perylene).

537 For PerTet-1, the rate of energy transfer was experimentally observed (Figure 4c, e) to be on  
538 picosecond timescale, while  $\tau_D$  is on a nanosecond timescale. This results in a very large  $k_{ET}\tau_D$  (on the  
539 order of  $10^3$ ) term, pushing the estimated energy transfer to 100%.

## 540 2.7 Time-Resolved Emission Spectroscopy

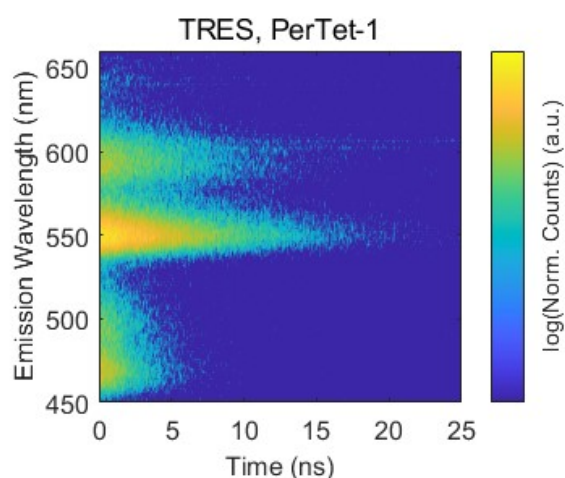

541

542 Figure S4 Time-resolved emission spectroscopy of PerTet-1 in toluene, showing two distinct sub-  
543 populations of perylene (<525nm) and TIPS-tetracene (>525nm) that have distinct emission lifetimes.

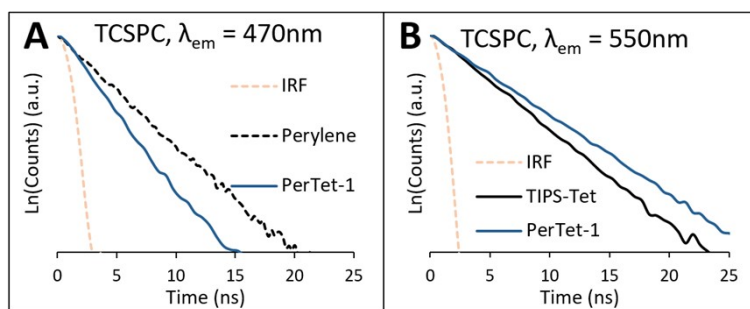

544

545 Figure S5. Time correlated single photon counting of A: perylene and PerTet-1 at in toluene emission  
 546 wavelength 470nm, and B: TIPS-tetracene and PerTet-1 in toluene at emission wavelength 550nm.

547

## 548 2.8 Tetracene degradation

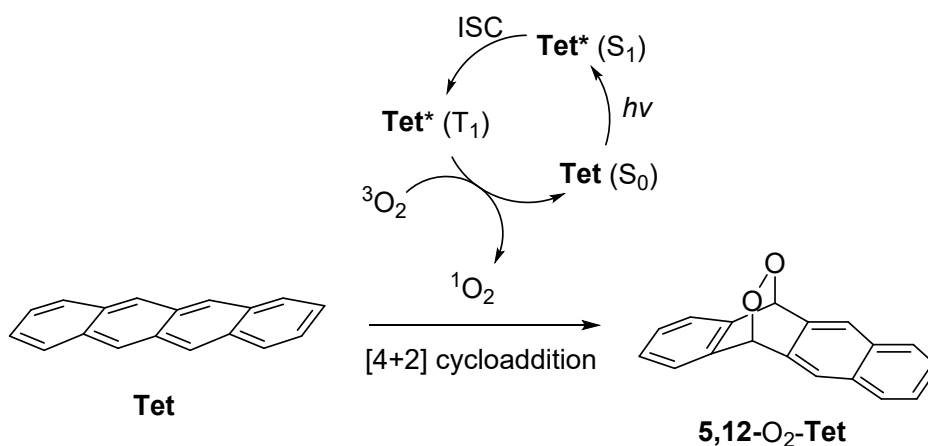

549

550 Scheme S5: Degradation pathway of tetracene to endoperoxide when reacting with singlet oxygen,  
 551  $^1\text{O}_2$ .  $^3\text{O}_2$  is sensitised to  $^1\text{O}_2$  with the T<sub>1</sub> state of tetracene, which forms after photoexcitation and  
 552 intersystem crossing (ISC) of tetracene.

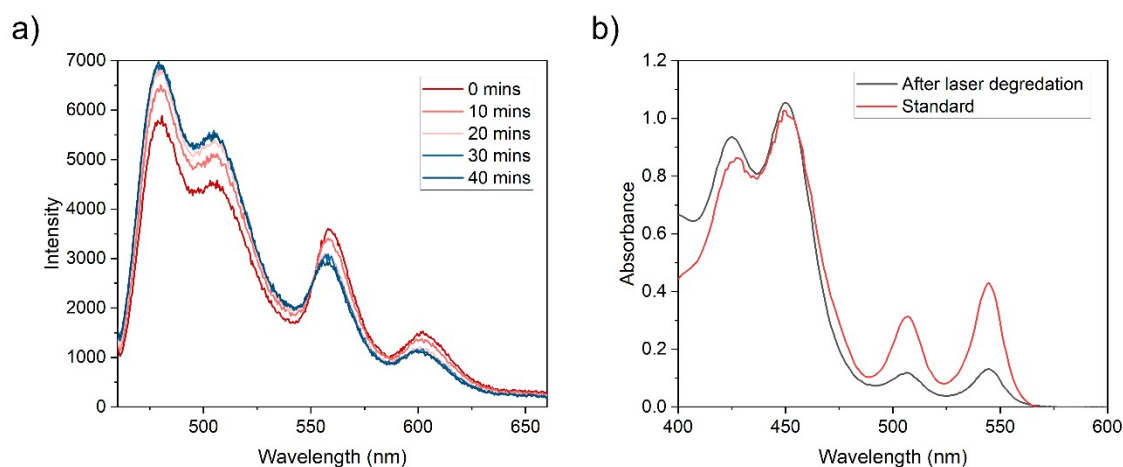

553

554 Figure S6. a) For the molecular degradation experiments, Per-Tet-1 was exciting with a 450nm laser  
 555 diode under 203 mW cm<sup>-2</sup> excitation. An emission spectrum was taken every 10 minutes. b) the  
 556 absorbance of Per-Ter-1 before and after laser degradation.

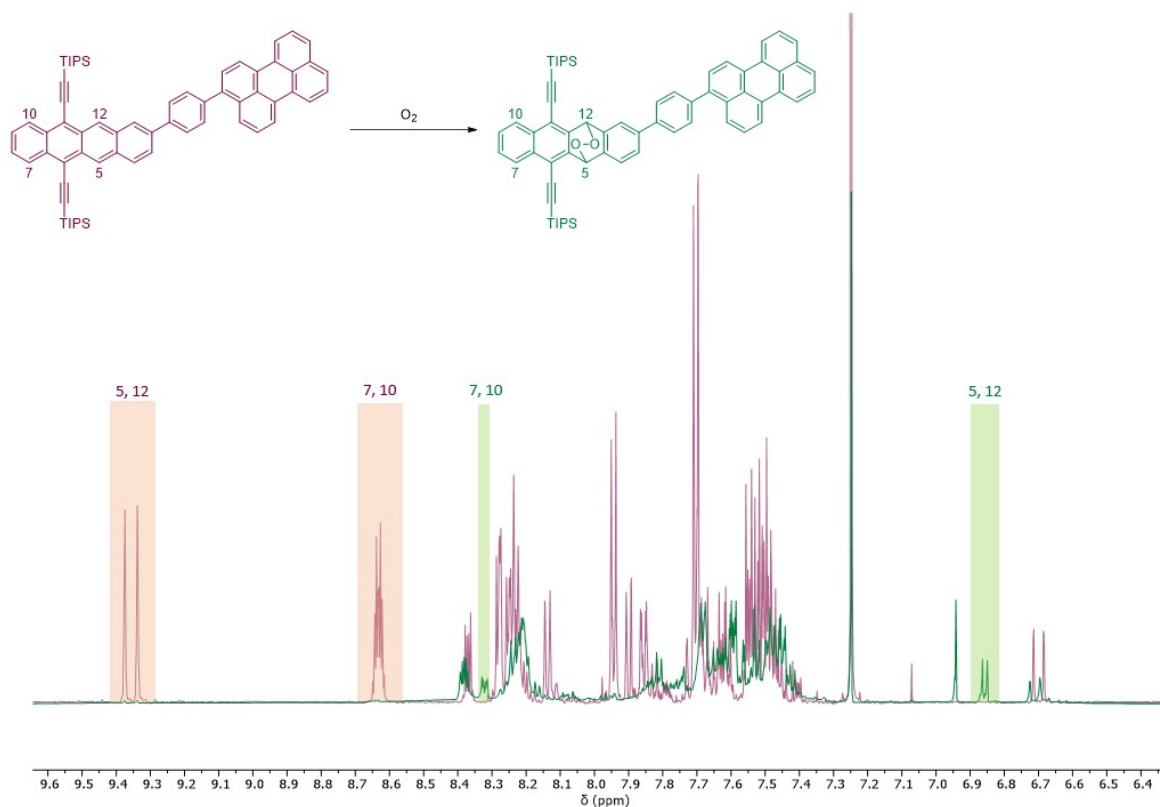

557

558 Figure S7. Presence of the endoperoxide can be seen in the <sup>1</sup>H NMR spectrum above. Disappearance  
 559 of the singlets corresponding to protons 5 and 12 of Per-TET-1 at ~9.3-9.4 ppm, and appearance of  
 560 singlets at 6.8-6.9 ppm is indicative of endoperoxide formation. Upfielding of these proton  
 561 environments is a result of the loss of aromatisation at the 5 and 12 positions. Similarly, the multiplet  
 562 corresponding to protons 7 and 10 have been upfielded due to the shielding effect of the  
 563 endoperoxide.

564

565

### 566 3 References

- 567 1. É. Torres, M. N. Berberan-Santos and M. J. Brites, *Dyes Pigm.*, 2015, **112**, 298-304.  
 568 2. K. E. Brown, B. S. Veldkamp, D. T. Co and M. R. Wasielewski, *J. Phys. Chem. Lett.*, 2012, **3**, 2362-  
 569 2366.  
 570 3. D. Kato, H. Sakai, N. V. Tkachenko and T. Hasobe, *Angew. Chem., Int. Ed.*, 2016, **55**, 5230-5234.  
 571 4. R. Thapa, J. Brown, T. Balestri and R. T. Taylor, *Tetrahedron Lett.*, 2014, **55**, 6743-6746.  
 572 5. M. P. Cava, A. A. Deana and K. Muth, *J. Am. Chem. Soc.*, 1959, **81**, 6458-6460.

- 573 6. J. L. Marshall, D. Lehnherr, B. D. Lindner and R. R. Tykwinski, *ChemPlusChem*, 2017, **82**, 967-  
574 1001.
- 575 7. S. N. Sanders, E. Kumarasamy, A. B. Pun, M. L. Steigerwald, M. Y. Sfeir and L. M. Campos,  
576 *Angew. Chem., Int. Ed.*, 2016, **55**, 3373-3377.
- 577 8. X. Yu, Z. Wang, M. Buchholz, N. Füllgrabe, S. Grosjean, F. Bebensee, S. Bräse, C. Wöll and L.  
578 Heinke, *Phys. Chem. Chem. Phys.*, 2015, **17**, 22721-22725.
- 579 9. R. Sato, D. Yoo and T. Mori, *CrystEngComm*, 2019, **21**, 3218-3222.
- 580 10. H. L. Stern, A. J. Musser, S. Gelinias, P. Parkinson, L. M. Herz, M. J. Bruzek, J. Anthony, R. H.  
581 Friend and B. J. Walker, *Proceedings of the National Academy of Sciences*, 2015, **112**, 7656-  
582 7661.
- 583 11. V. Gray, Z. Zhang, S. Dowland, J. R. Allardice, A. M. Alvertis, J. Xiao, N. C. Greenham, J. E.  
584 Anthony and A. Rao, *J. Phys. Chem. Lett.*, 2020, **11**, 7239-7244.
- 585 12. A. Neubauer, J. M. Szarko, A. F. Bartelt, R. Eichberger and T. Hannappel, *J. Phys. Chem. C*, 2011,  
586 **115**, 5683-5691.
- 587 13. A. A. Taherpour, *Arab. J. Chem.*, 2017, **10**, S609-S616.

588
